# Supplementary material
Source: PubMed Central journal article supplement (PMC5074602)

## **Transgressive expression of genes at the transcript level among ILs**

Interspecific crosses combining divergent genomes can sometimes result in improved performance. Transcriptomic studies of wild and resynthesized hybrids show extensive gene expression alterations in the hybrids compared to their parents (Hegarty et al., 2008). The IL population allows us to study the combination of divergent genomes across many genetically distinct lines. Many of the changes we see are “transgressive”, falling outside the range seen in either parent. A total of 2,286 genes, more than one fourth of unique DE genes between the ILs and cv. M82, showed transgressive expression patterns, i.e. genes were differentially expressed for the IL but not for *S. pennellii* compared to cv. M82 (Supplemental Dataset 22). These genes were distributed across all ILs but the extent of transgressive gene expression varied among the ILs. ILs with high number of differentially expressed genes, such as IL6.2.2, IL4.3, and IL8.1, also showed higher number of transgressively expressed genes (Figure S12A in this document). While synthetic allotetraploids generated from interspecific crosses show large scale down regulation of gene expression (likely due to silencing of duplicate gene copies (Wang et al., 2006) and the affected genes fall in the categories of cell defense, ageing and hormonal regulation, the transgressive genes in this IL population generated by interspecific crossing show mostly upregulation of gene expression with genes falling in the broad categories of photosynthesis, energy metabolism, microtubule movement, and extrinsic membrane components (See following table on GO-enrichment). In order to estimate the relative effect of the introgression on transgressive gene expression, we quantified the ratio of the number of genes with transgressive expression to

the number of genes with *S. pennellii* like expression (transgressive\_to\_*S. pennellii*-like) for each IL (Figure S12B in this document). A few ILs, such as IL1.4.18, IL4.3, IL7.3, IL8.1, IL11.1, and IL12.1.1, showed a transgressive\_by\_*S. pennellii* value greater than 0.5, suggesting a higher effect of the corresponding introgression on gene expression in M82 background. Most of the transgressively expressed genes for each IL were located in *trans*, beyond the introgression region (Figure S12A in this document). These may result from novel combinations of regulatory factors (Riddle and Birchler, 2003), recombination of alleles present at different loci in the parent species through complementary gene action (Rieseberg et al., 1999), more abundant production of small interfering (si) RNAs in progeny of interspecific crosses than in either parent with concomitant suppression of the corresponding target genes, and hypermethylation of the corresponding genomic DNA (Shivaprasad et al., 2012).

#### References:

- Hegarty MJ, Barker GL, Brennan AC, Edwards KJ, Abbott RJ, Hiscock SJ** (2008) Changes to gene expression associated with hybrid speciation in plants: further insights from transcriptomic studies in *Senecio*. *Philos Trans R Soc Lond B Biol Sci* **363**: 3055-3069
- Riddle NC, Birchler JA** (2003) Effects of reunited diverged regulatory hierarchies in allopolyploids and species hybrids. *Trends Genet* **19**: 597-600
- Rieseberg LH, Archer MA, Wayne RK** (1999) Transgressive segregation, adaptation and speciation. *Heredity (Edinb)* **83 ( Pt 4)**: 363-372
- Shivaprasad PV, Dunn RM, Santos BA, Bassett A, Baulcombe DC** (2012) Extraordinary transgressive phenotypes of hybrid tomato are influenced by epigenetics and small silencing RNAs. *EMBO J* **31**: 257-266
- Wang J, Tian L, Lee HS, Wei NE, Jiang H, Watson B, Madlung A, Osborn TC, Doerge RW, Comai L, Chen ZJ** (2006) Genomewide nonadditive gene regulation in *Arabidopsis* allotetraploids. *Genetics* **172**: 507-517

**Table:** GO-enrichment results for genes showing transgressive expression

| <b>Enriched GO-categories for the genes showing transgressive expression</b> |                                                                                                                                                               |
|------------------------------------------------------------------------------|---------------------------------------------------------------------------------------------------------------------------------------------------------------|
| GO:0010287                                                                   | plastoglobule                                                                                                                                                 |
| GO:0009535                                                                   | chloroplast thylakoid membrane                                                                                                                                |
| GO:0009523                                                                   | photosystem II                                                                                                                                                |
| GO:0016168                                                                   | chlorophyll binding                                                                                                                                           |
| GO:0009765                                                                   | photosynthesis, light harvesting                                                                                                                              |
| GO:0009522                                                                   | photosystem I                                                                                                                                                 |
| GO:0015979                                                                   | photosynthesis                                                                                                                                                |
| GO:0009941                                                                   | chloroplast envelope                                                                                                                                          |
| GO:0018298                                                                   | protein-chromophore linkage                                                                                                                                   |
| GO:0030095                                                                   | chloroplast photosystem II                                                                                                                                    |
| GO:0009543                                                                   | chloroplast thylakoid lumen                                                                                                                                   |
| GO:0009654                                                                   | photosystem II oxygen evolving complex                                                                                                                        |
| GO:0019253                                                                   | reductive pentose-phosphate cycle                                                                                                                             |
| GO:0016717                                                                   | oxidoreductase activity, acting on paired donors, with oxidation of a pair of donors resulting in the reduction of molecular oxygen to two molecules of water |
| GO:0009538                                                                   | photosystem I reaction center                                                                                                                                 |
| GO:0009570                                                                   | chloroplast stroma                                                                                                                                            |
| GO:0019898                                                                   | extrinsic component of membrane                                                                                                                               |
| GO:0042651                                                                   | thylakoid membrane                                                                                                                                            |
| GO:0007018                                                                   | microtubule-based movement                                                                                                                                    |

| <b>Enriched GOslim-categories for the genes showing transgressive expression</b> |                                                |
|----------------------------------------------------------------------------------|------------------------------------------------|
| GO:0015979                                                                       | photosynthesis                                 |
| GO:0009579                                                                       | thylakoid                                      |
| GO:0009536                                                                       | plastid                                        |
| GO:0006091                                                                       | generation of precursor metabolites and energy |
| GO:0005576                                                                       | extracellular region                           |
| GO:0003774                                                                       | motor activity                                 |
| GO:0003824                                                                       | catalytic activity                             |
| GO:0003674                                                                       | molecular_function                             |

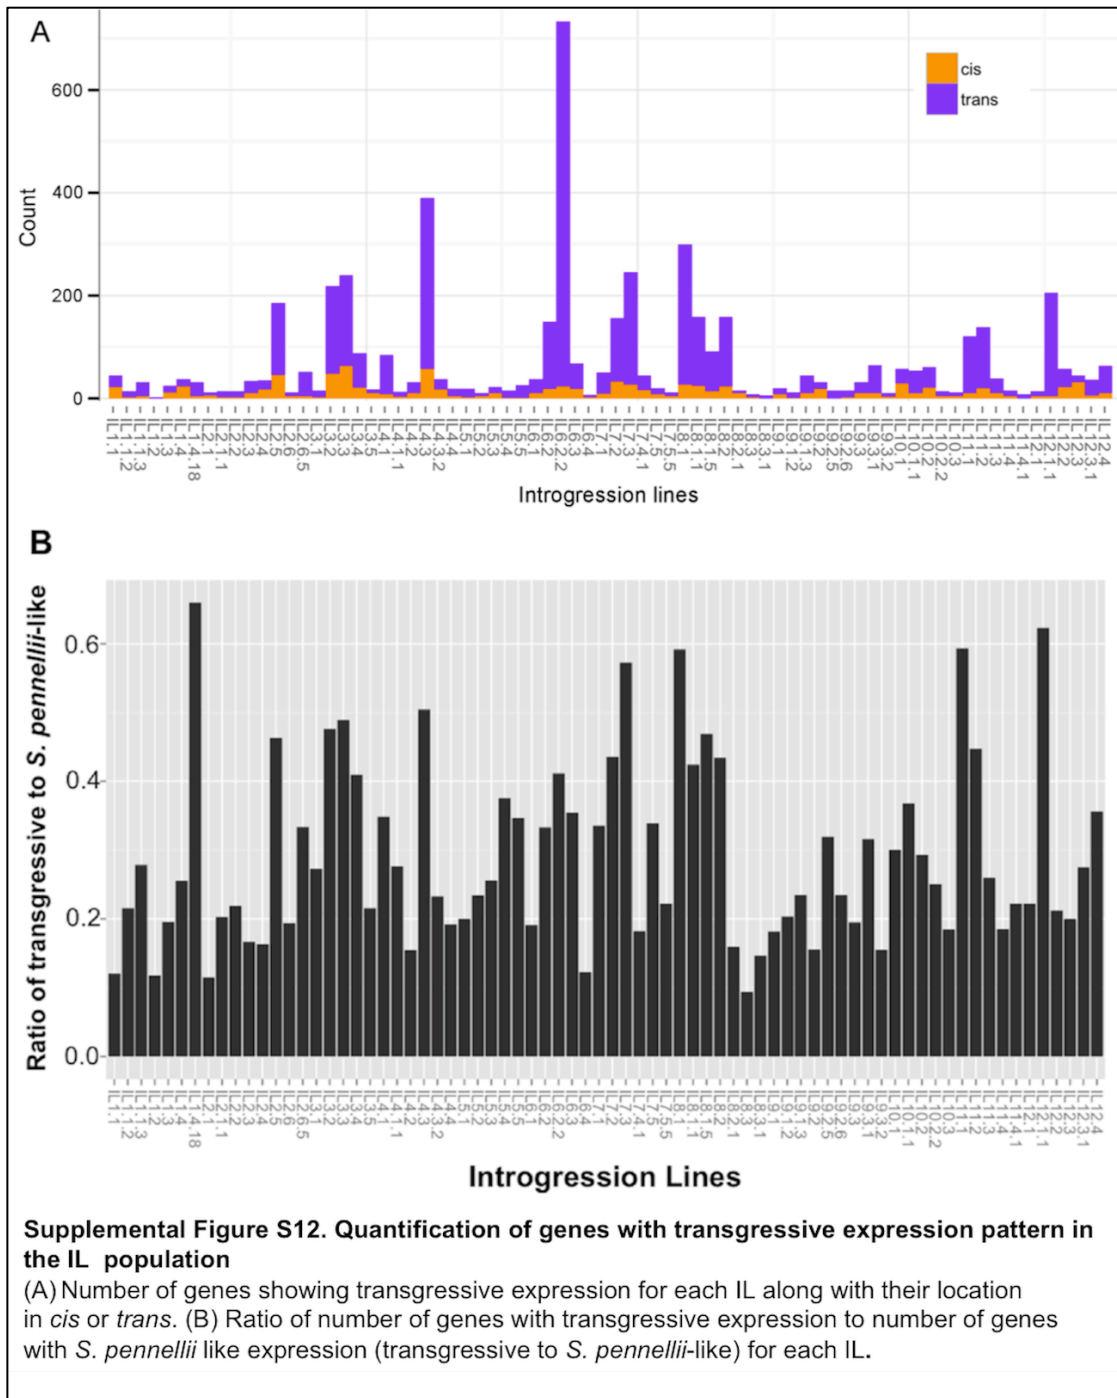

Supplement: supp_pp.16.00289_PP2016-00289DR2_Supplemental_Dataset_2.pdf [file supp_pp.16.00289_PP2016-00289DR2_Supplemental_Dataset_2.pdf]
