# Supplementary material
Source: PubMed Central journal article supplement (PMC5074602)
Supplement: supp_pp.16.00289_PP2016-00289DR2_Supplemental_Figure_1.pdf [file supp_pp.16.00289_PP2016-00289DR2_Supplemental_Figure_1.pdf]

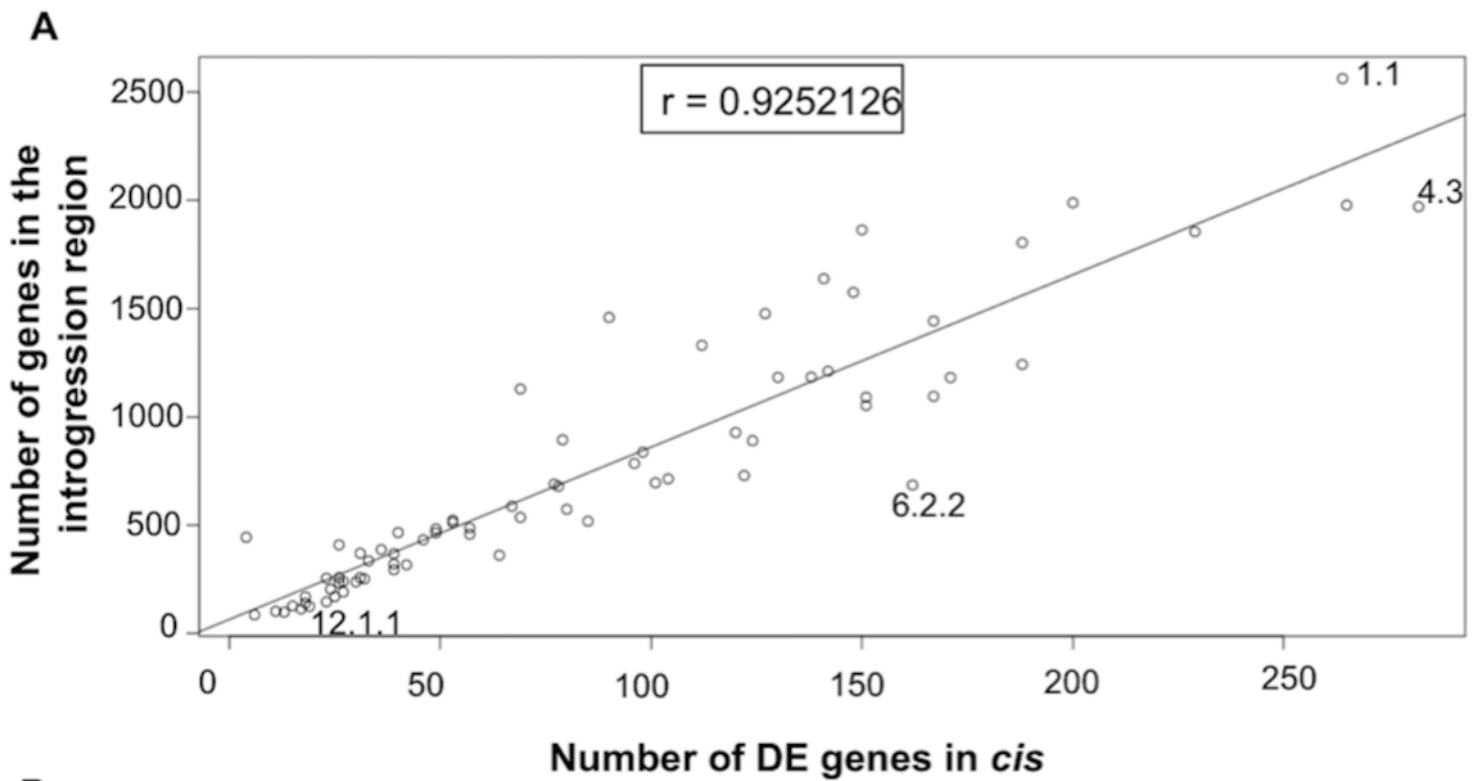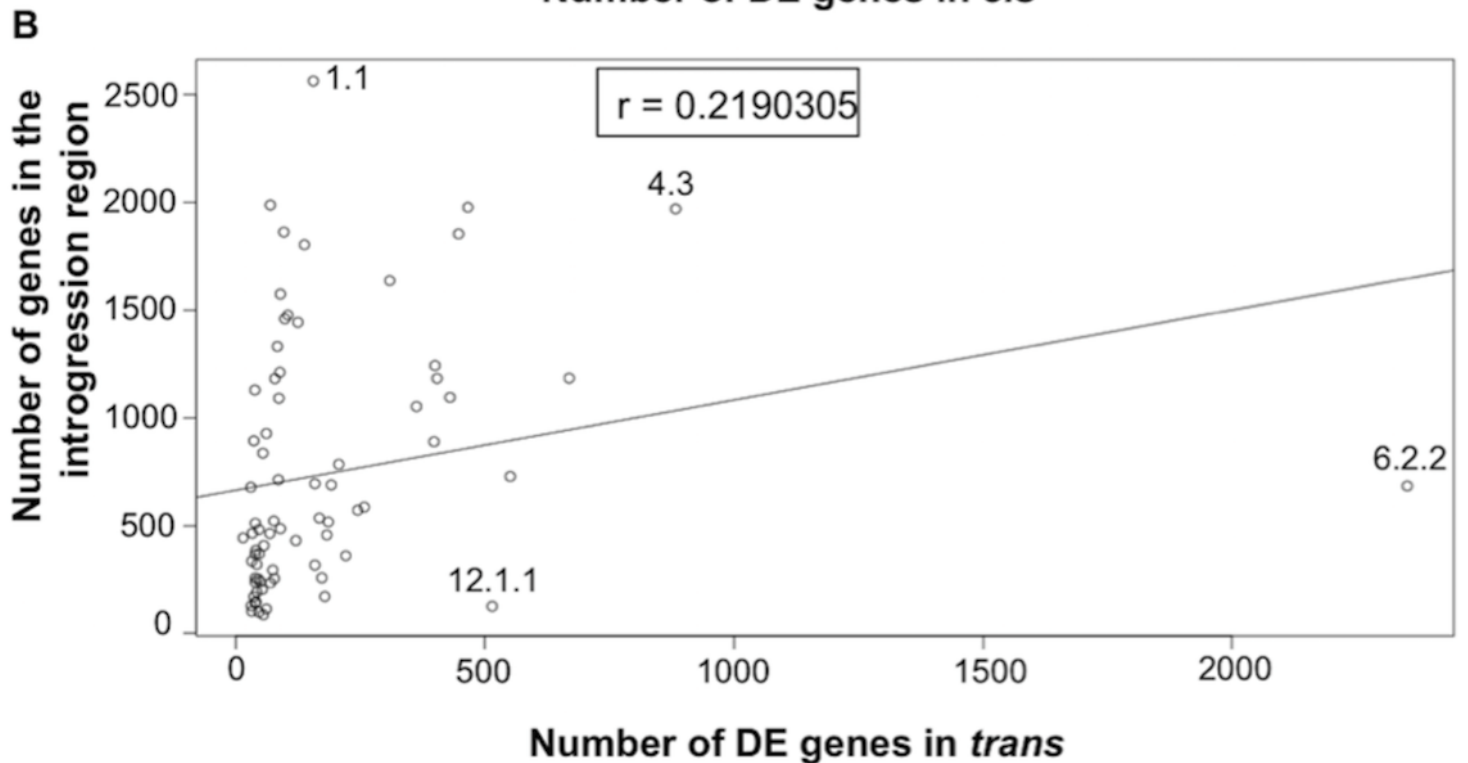

**Supplemental Figure S1. Number of genes in the introgression region for an IL and the number of differentially expressed genes at the transcript level compared to cv. M82.**

Strong correlation was observed for differentially expressed genes in *cis* (A), whereas a weak correlation was observed for genes in *trans* (B).
