# Supplementary material
Source: PubMed Central journal article supplement (PMC5074602)
Supplement: supp_pp.16.00289_PP2016-00289DR2_Supplemental_Figure_2.pdf [file supp_pp.16.00289_PP2016-00289DR2_Supplemental_Figure_2.pdf]

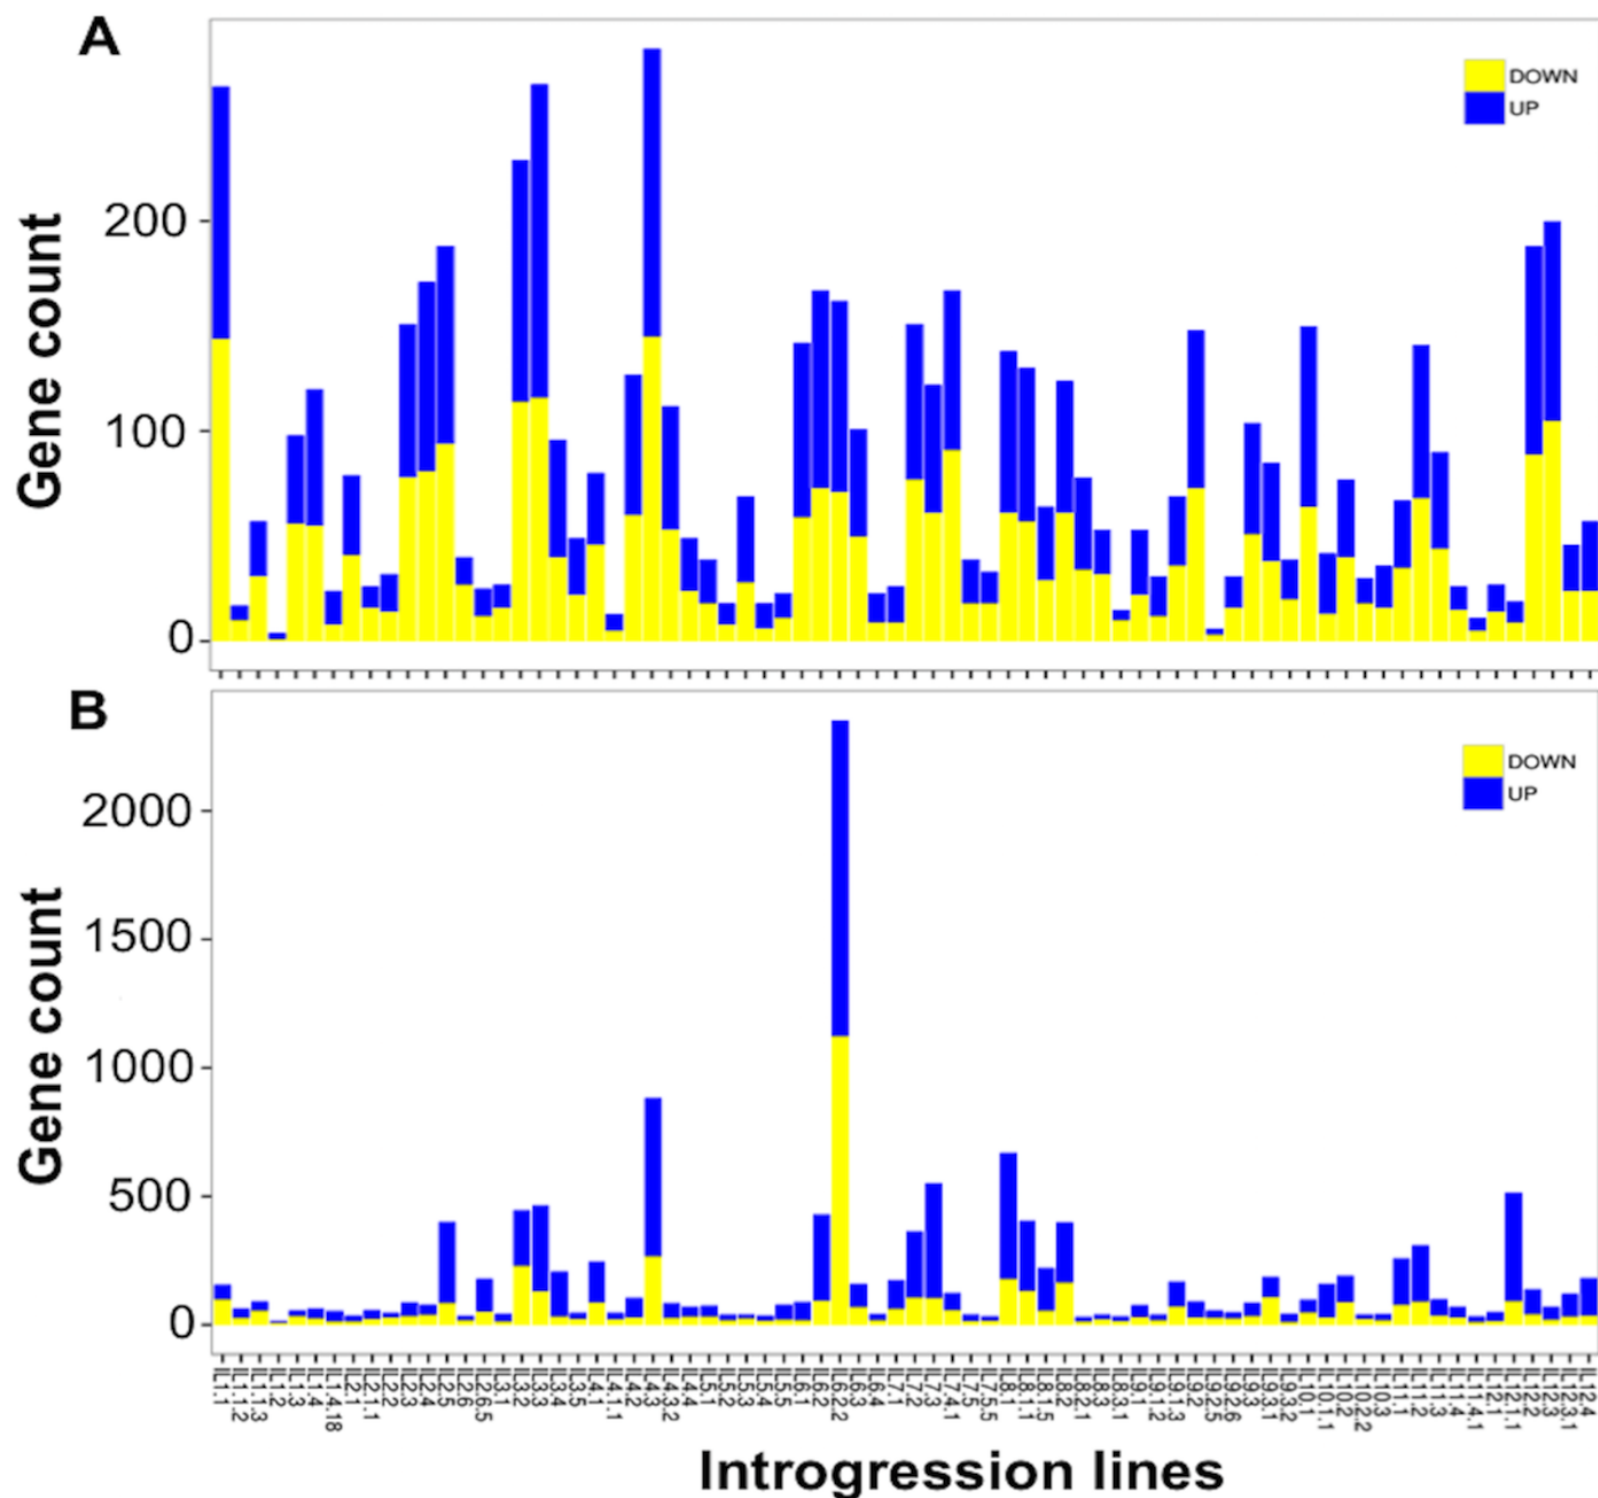

**Supplemental Figure S2. Histograms for differentially expressed genes at the transcript level for the ILs. Genes with increased or decreased transcript levels for the ILs in *cis* (A), and in *trans* (B).**
