# Supplementary material
Source: PubMed Central journal article supplement (PMC5074602)
Supplement: supp_pp.16.00289_PP2016-00289DR2_Supplemental_Figure_4.pdf [file supp_pp.16.00289_PP2016-00289DR2_Supplemental_Figure_4.pdf]

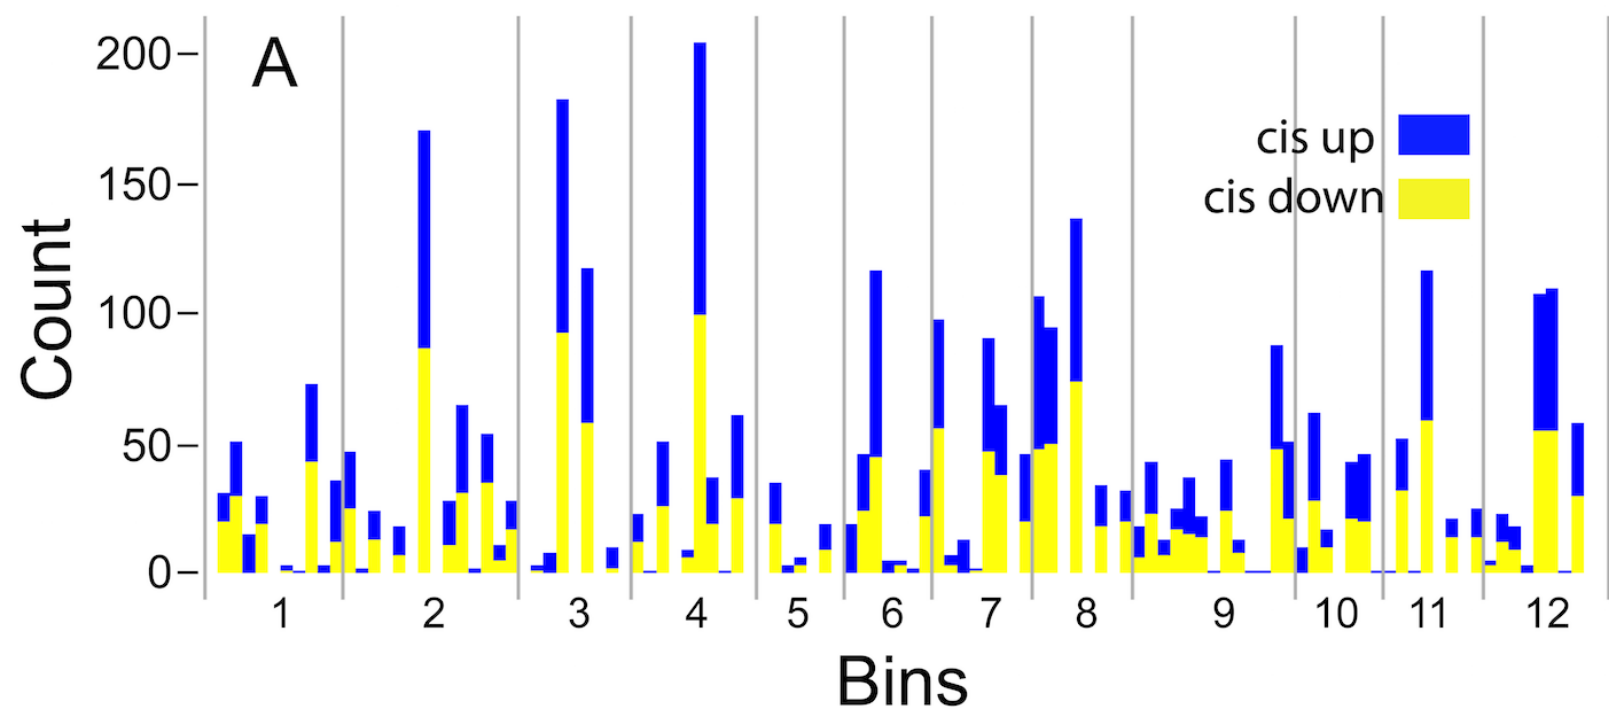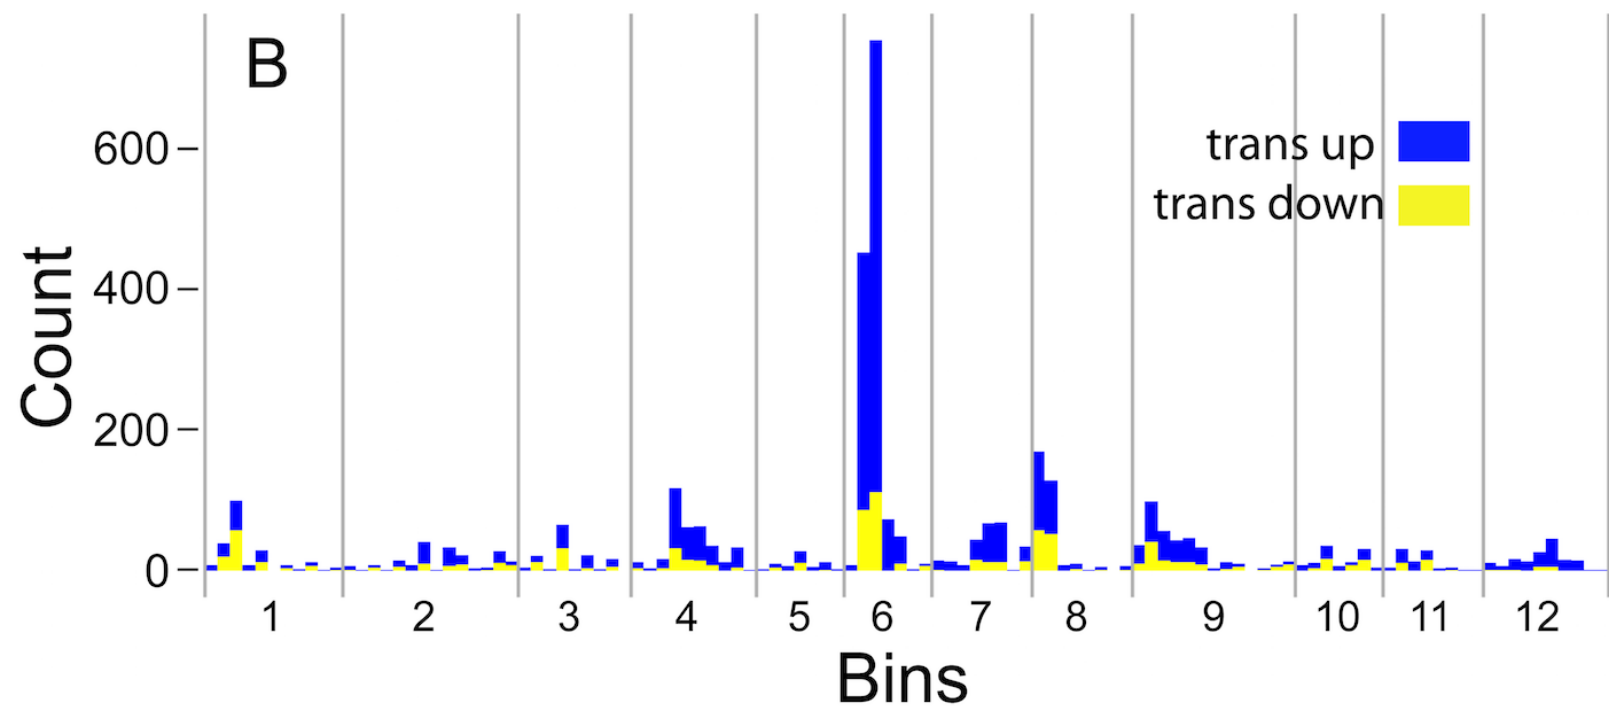

**Supplemental Figure S4. *Cis*- and *Trans*-eQTL.** Histograms plotting the numbers of significant eQTL mapped to each bin across the 12 chromosomes of *S. lycopersicum* (M82). A. *cis*-eQTL. B. *trans*-eQTL.
