# Supplementary material
Source: PubMed Central journal article supplement (PMC5074602)
Supplement: supp_pp.16.00289_PP2016-00289DR2_Supplemental_Figure_5.pdf [file supp_pp.16.00289_PP2016-00289DR2_Supplemental_Figure_5.pdf]

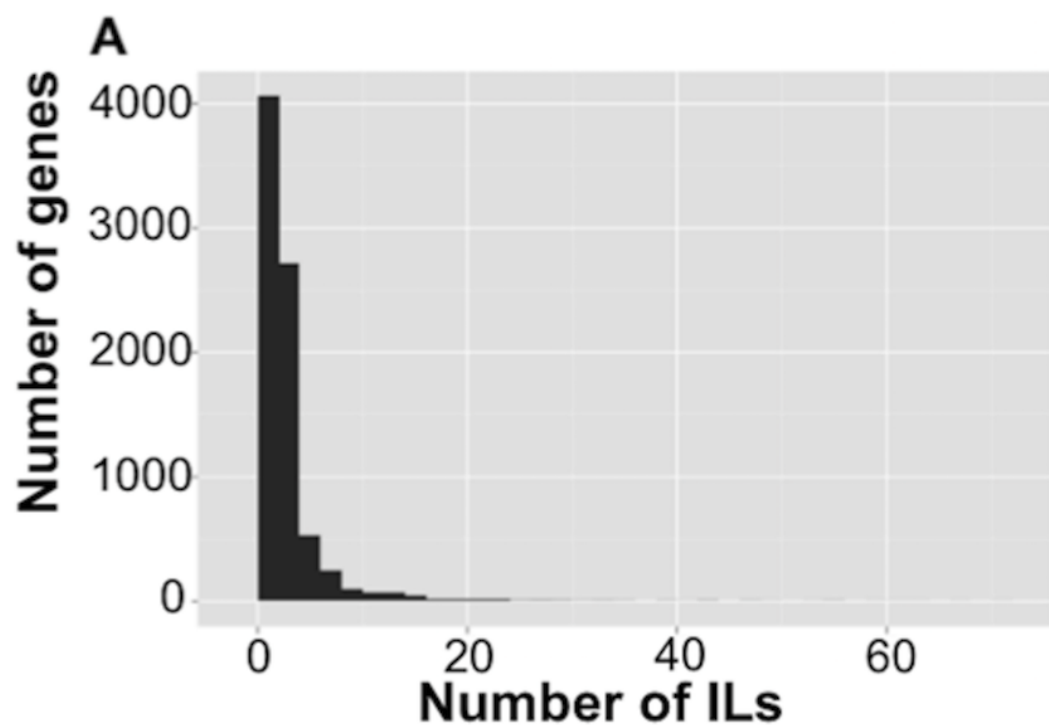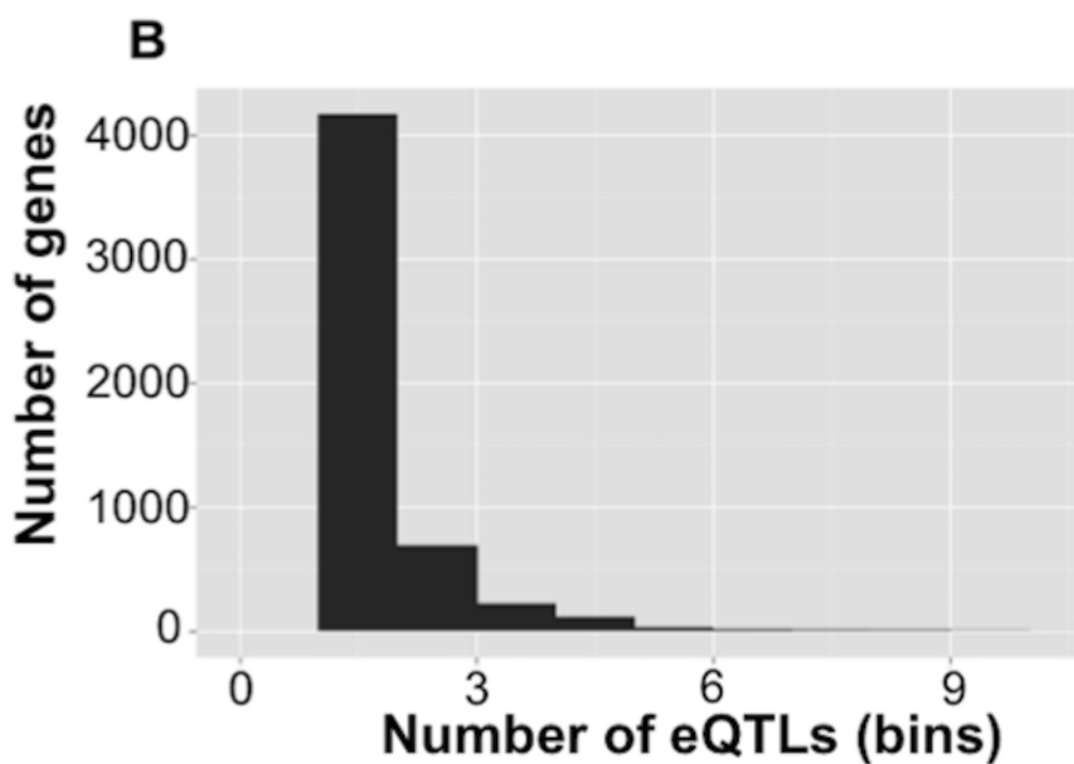

**Supplemental Figure S5. Frequency and distribution of differentially expressed genes at the transcript level for the IL population at the introgression and the bin level.**

(A) Frequency of genes differentially expressed in one or more ILs. (B) Frequency of genes being regulated by one or more BINs/eQTL.
