# Supplementary material
Source: PubMed Central journal article supplement (PMC5074602)
Supplement: supp_pp.16.00289_PP2016-00289DR2_Supplemental_Figure_6.pdf [file supp_pp.16.00289_PP2016-00289DR2_Supplemental_Figure_6.pdf]

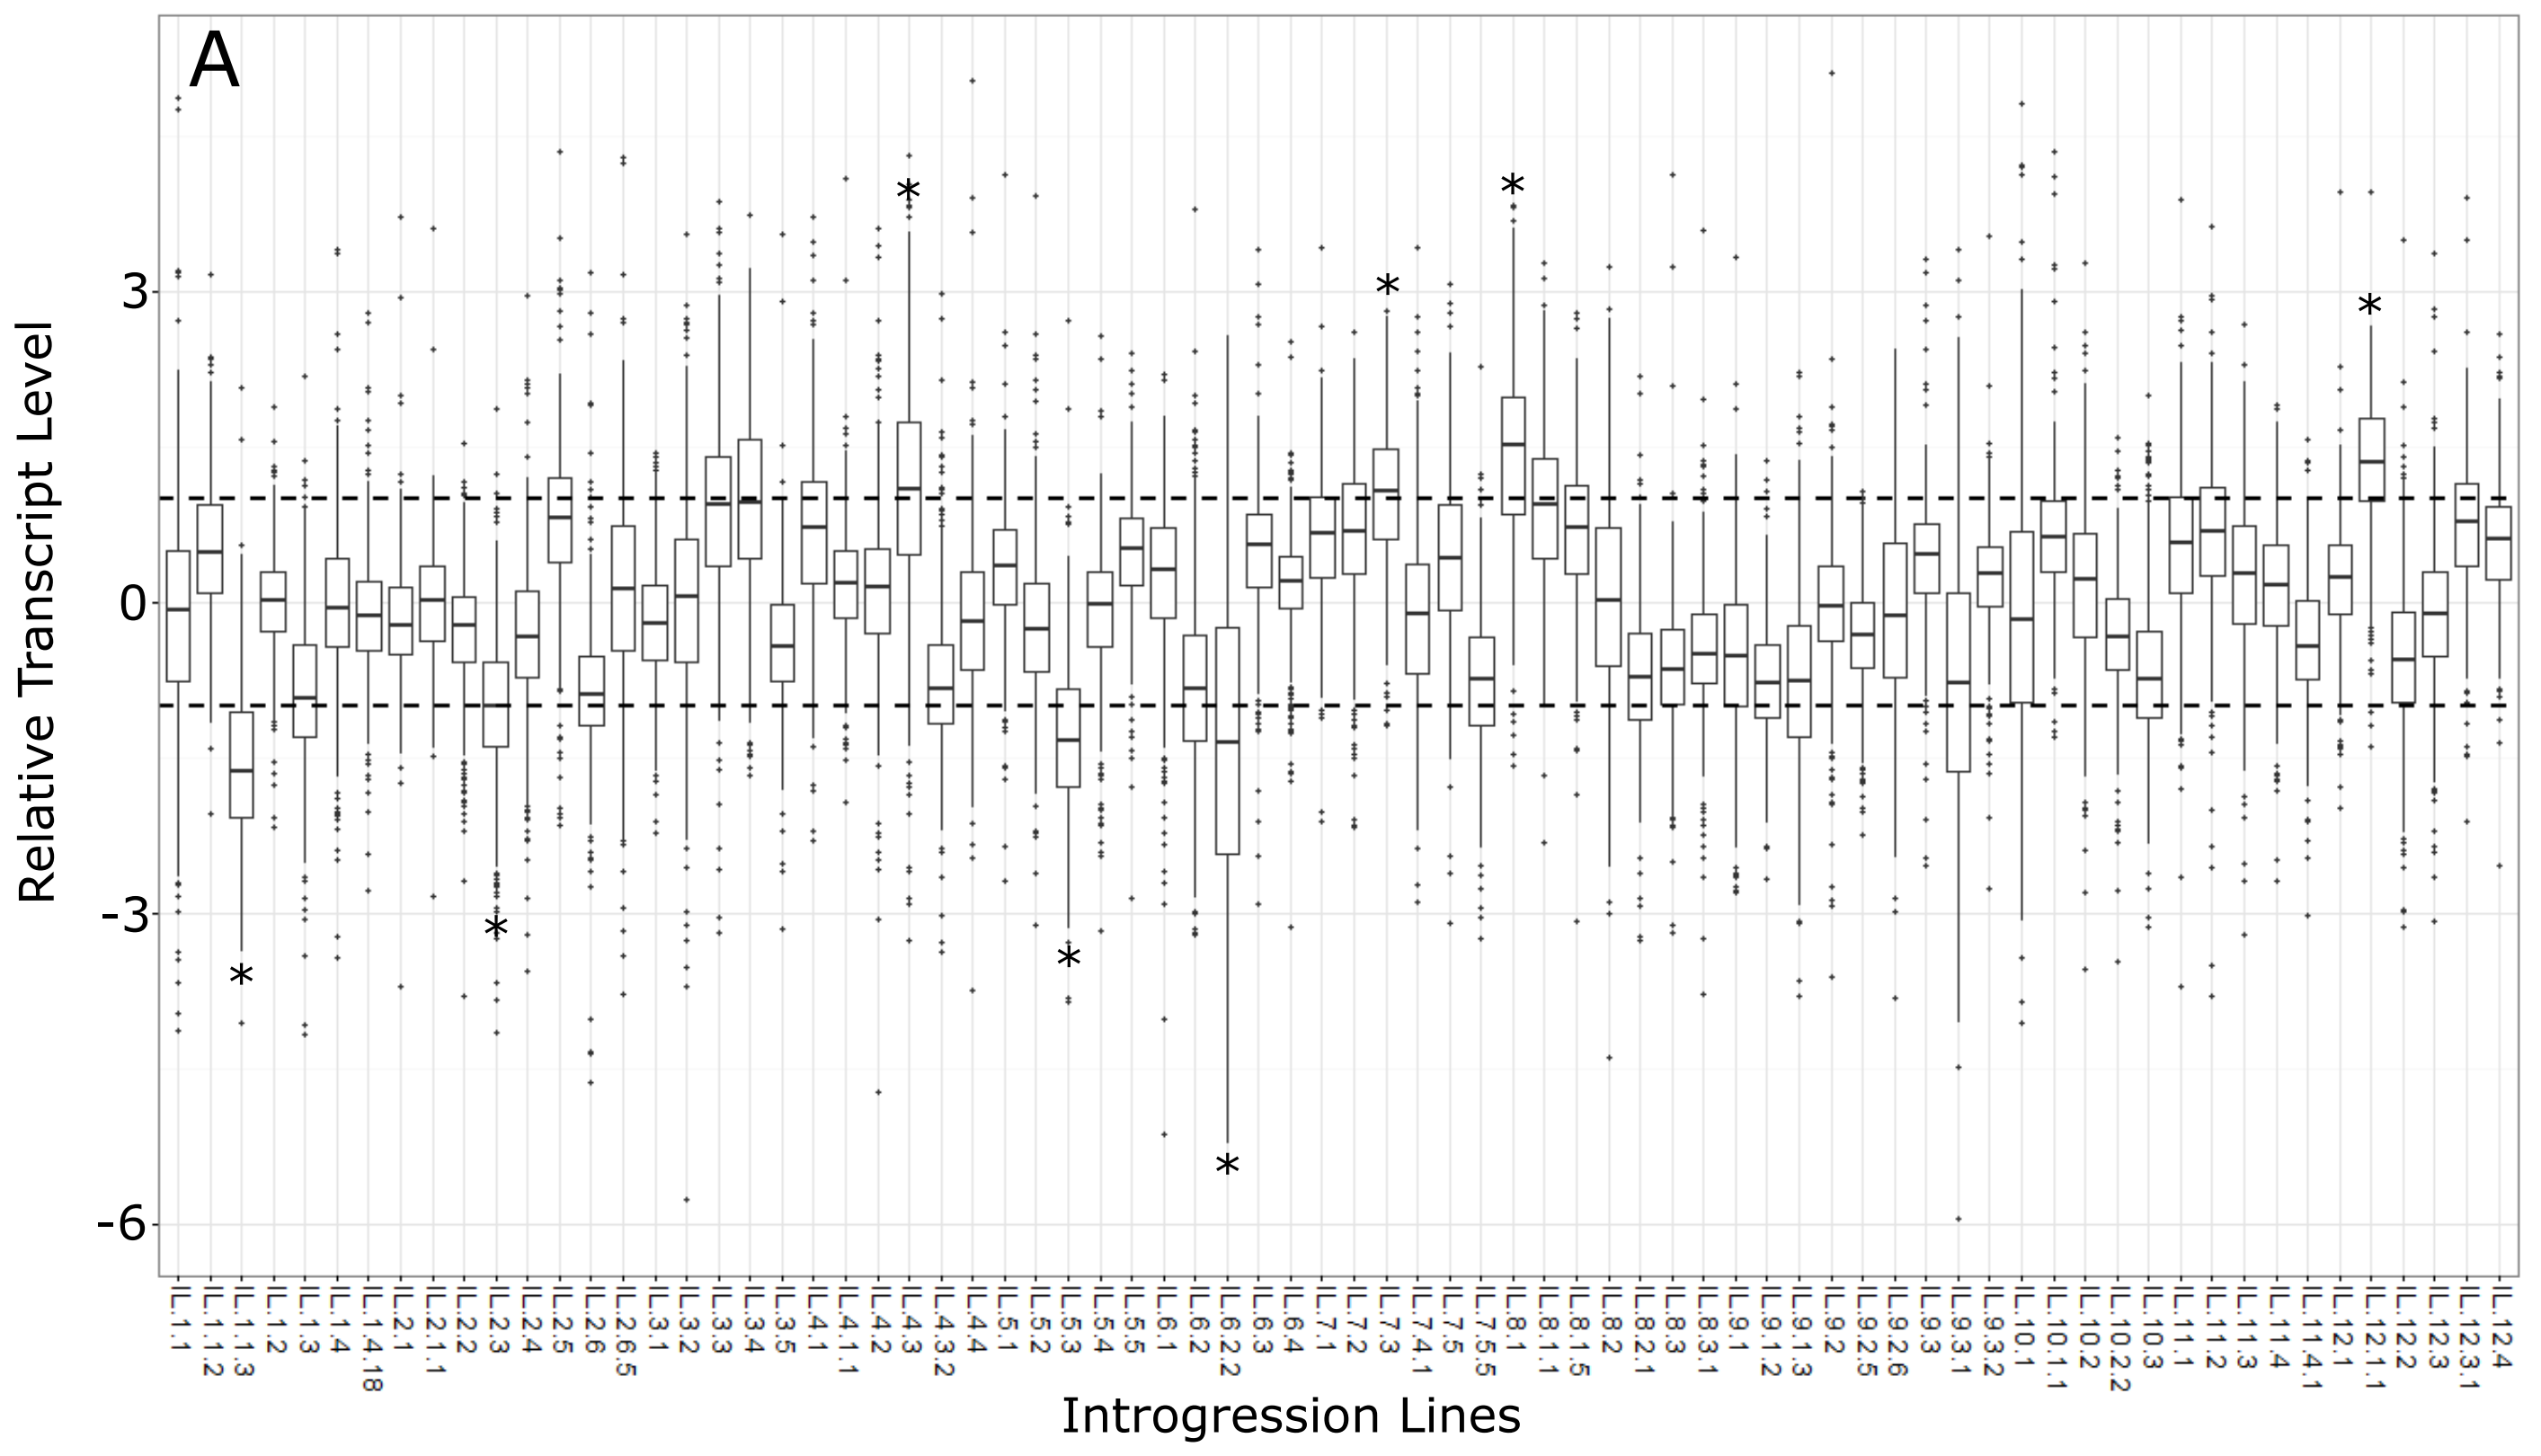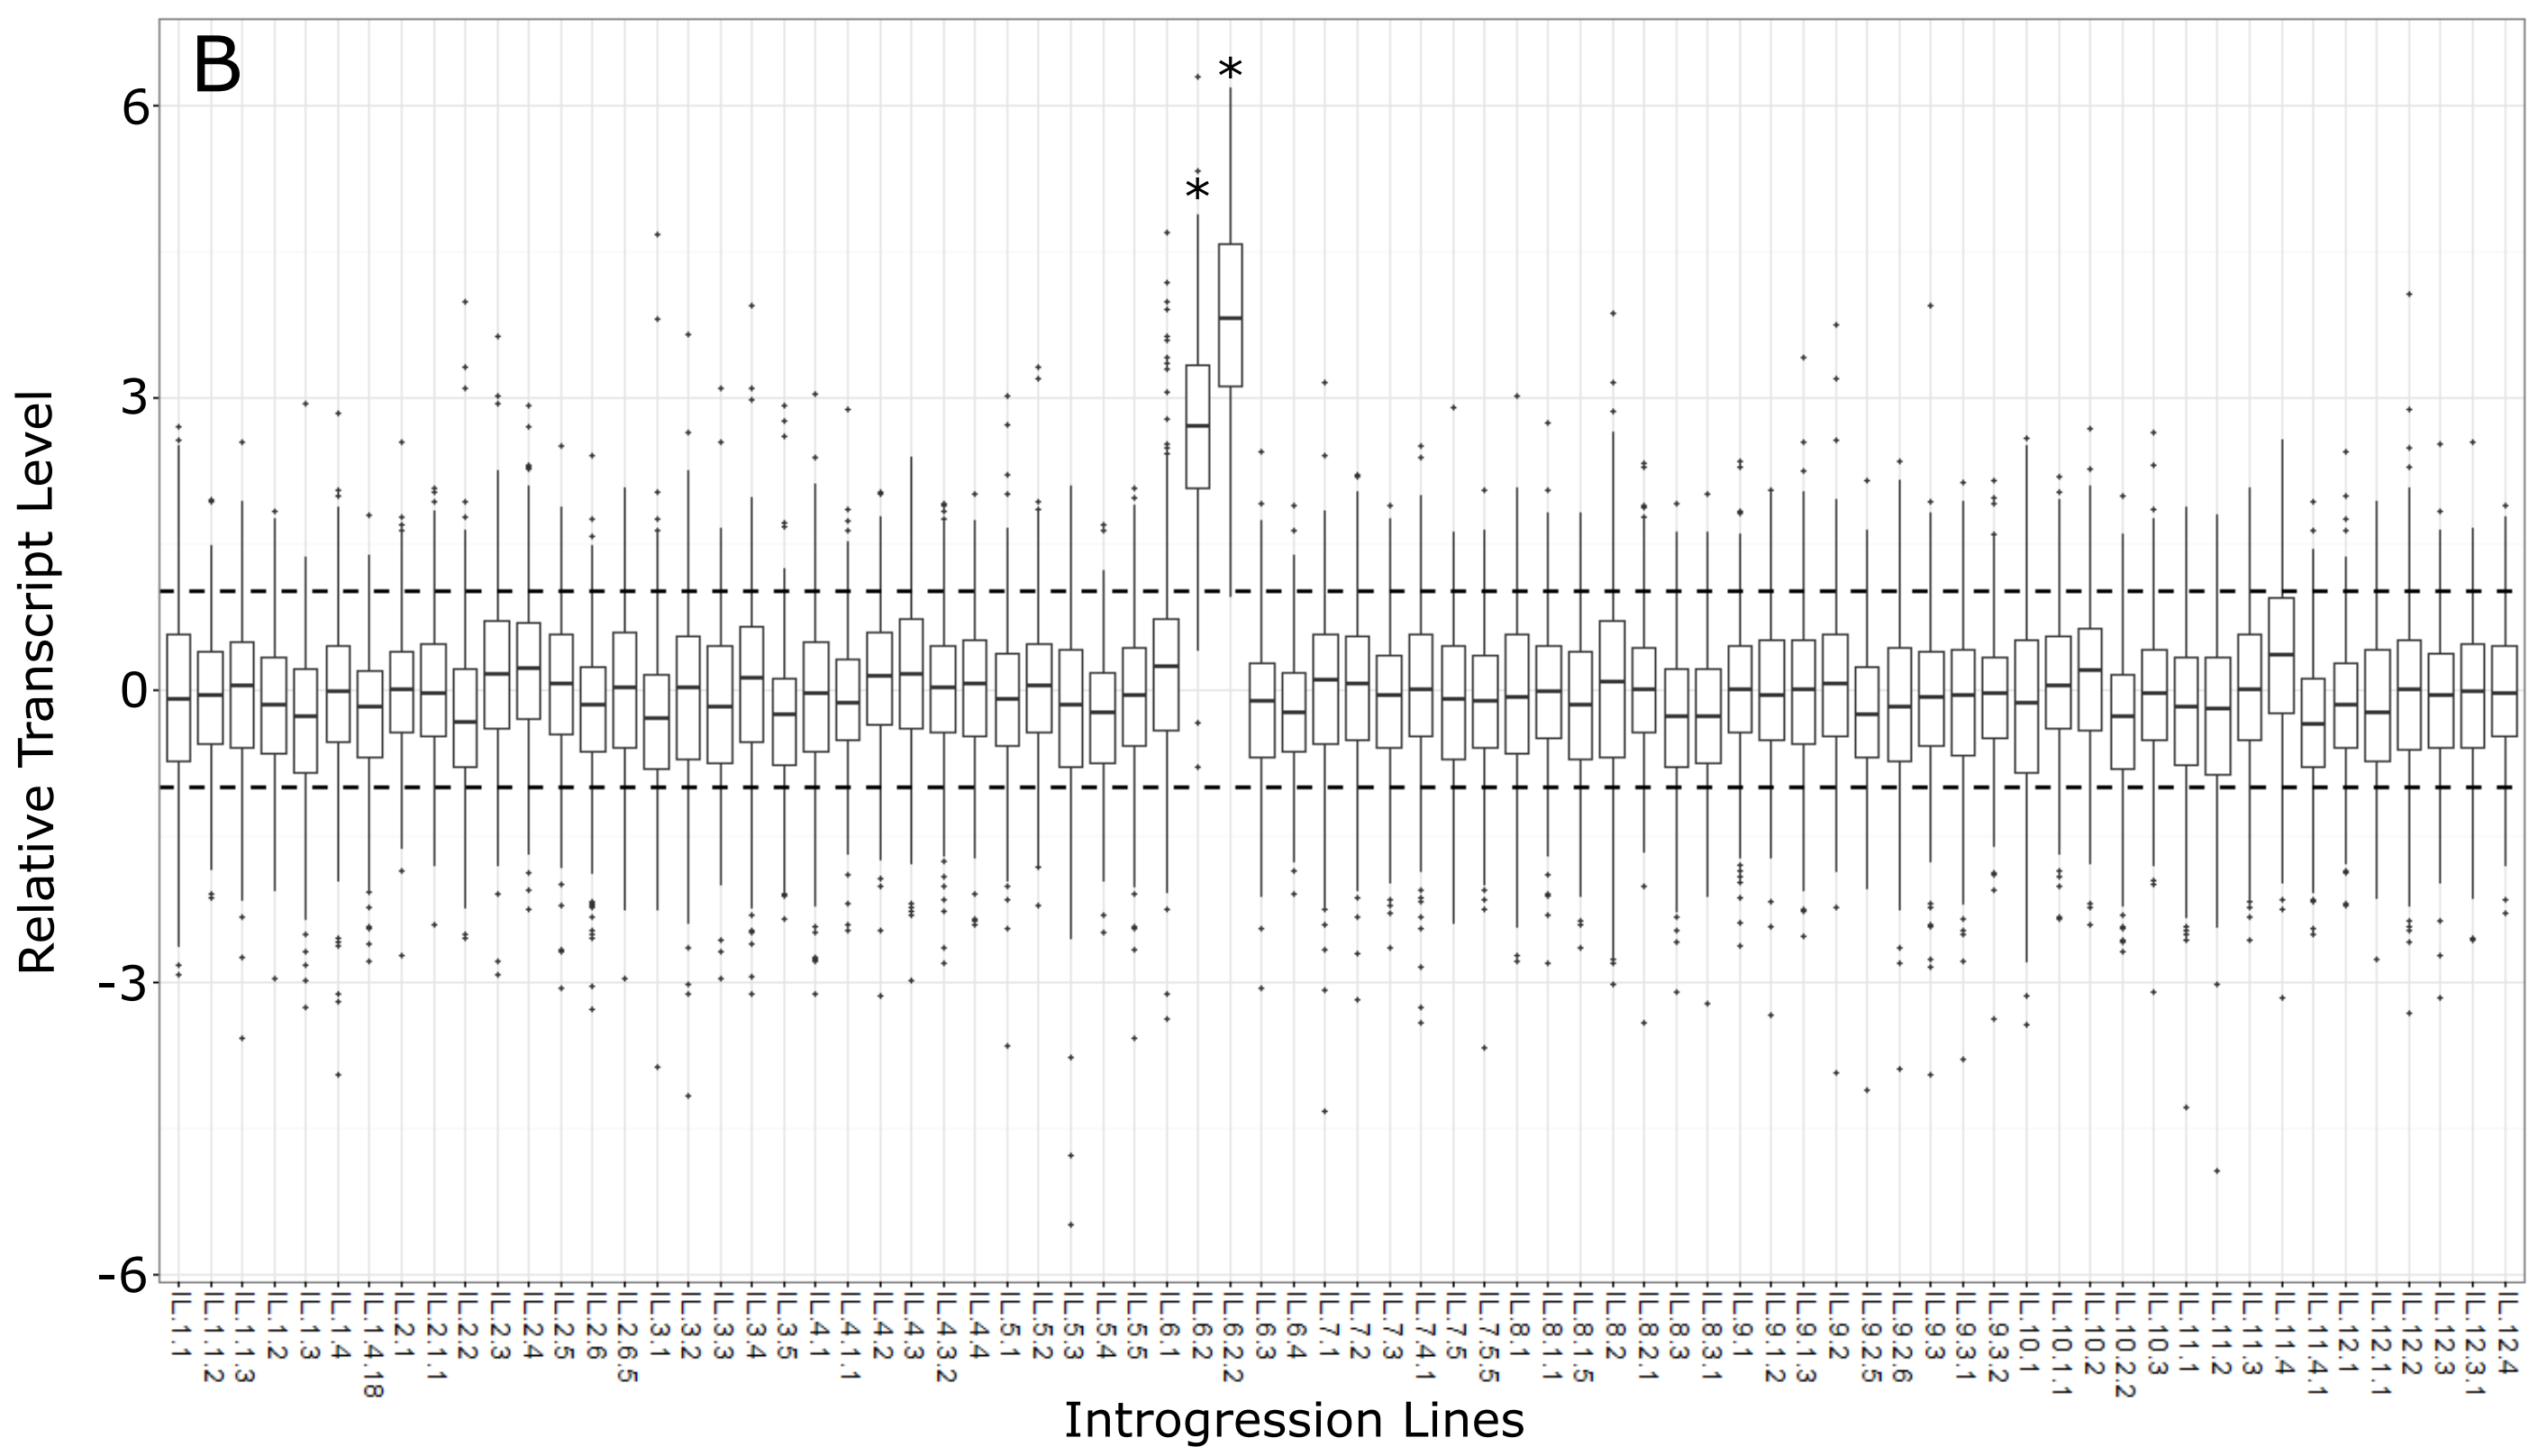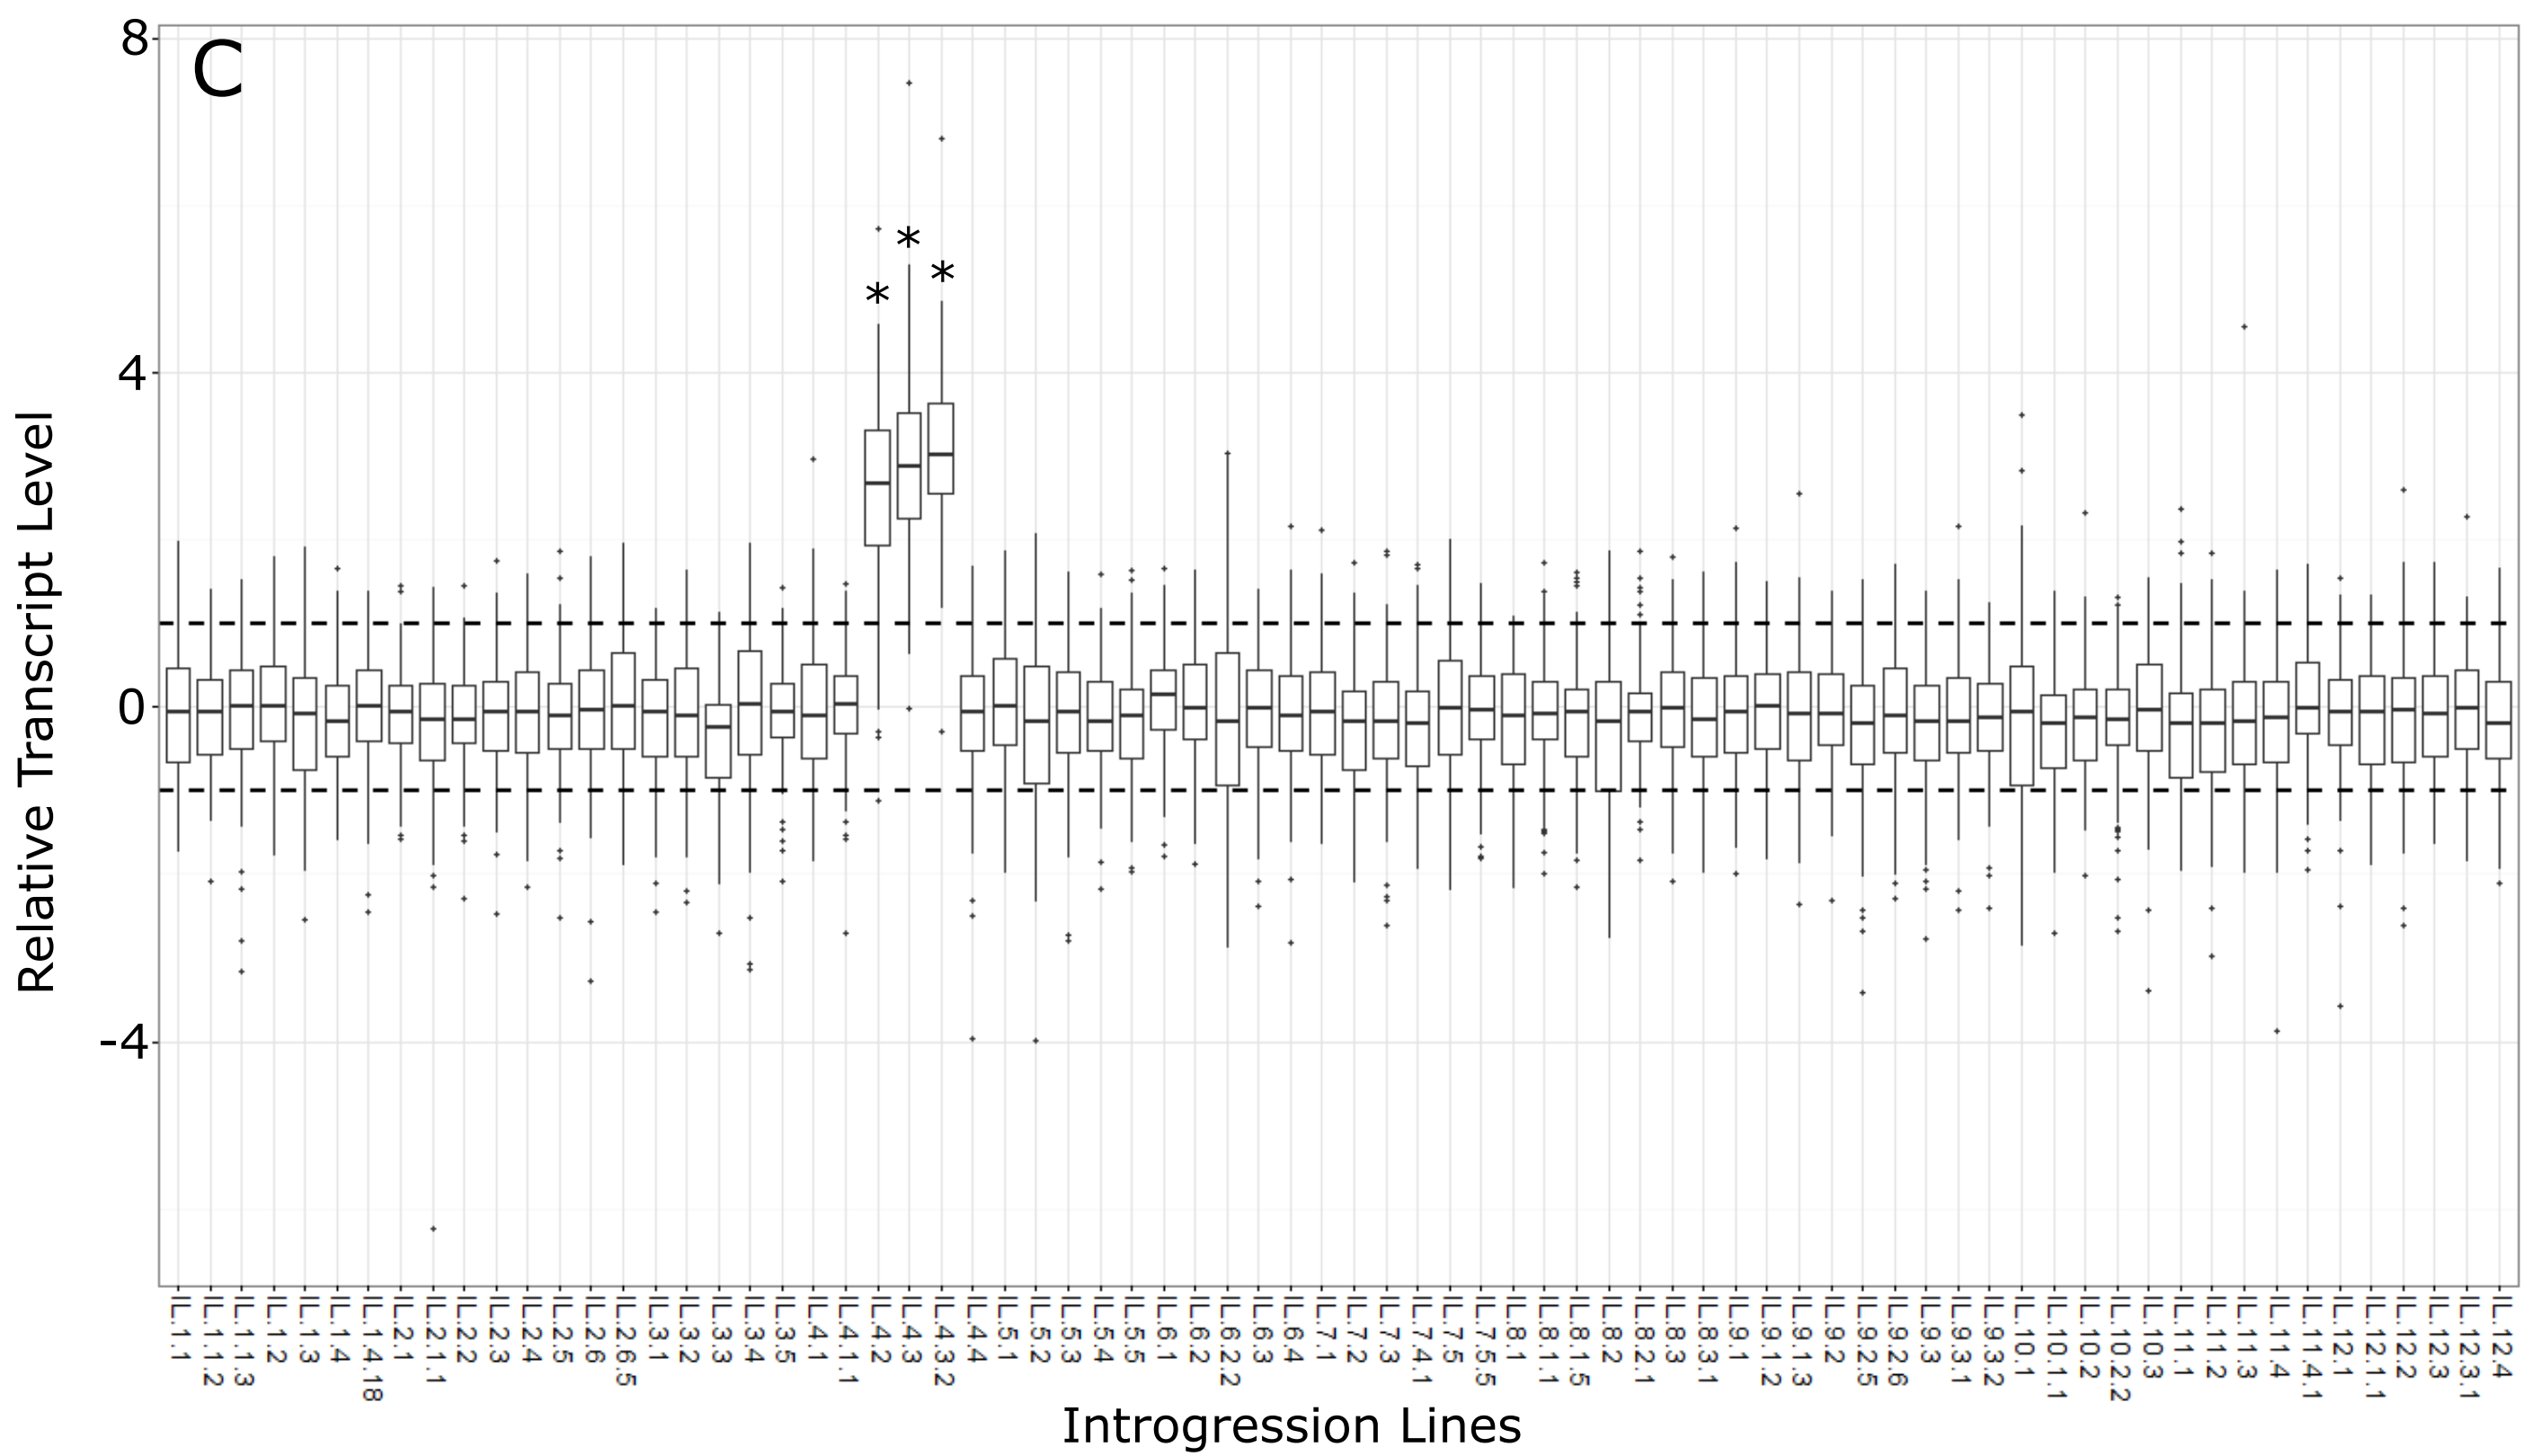

**Supplemental Figure S6. Boxplots of the normalized transcript levels for the three landmark modules.** The relative transcript levels of all genes found in each module for the 74 ILs. The y-axis is the relative transcript level of all eQTL for each IL. (A) Photosynthesis module. (B) Defense, metabolism, and signaling module. (C) Cysteine-type peptidase activity module. Asterisks represent ILs with a median transcript level significantly different from the module mean.
