# Supplementary material
Source: PubMed Central journal article supplement (PMC5074602)
Supplement: supp_pp.16.00289_PP2016-00289DR2_Supplemental_Figure_7.pdf [file supp_pp.16.00289_PP2016-00289DR2_Supplemental_Figure_7.pdf]

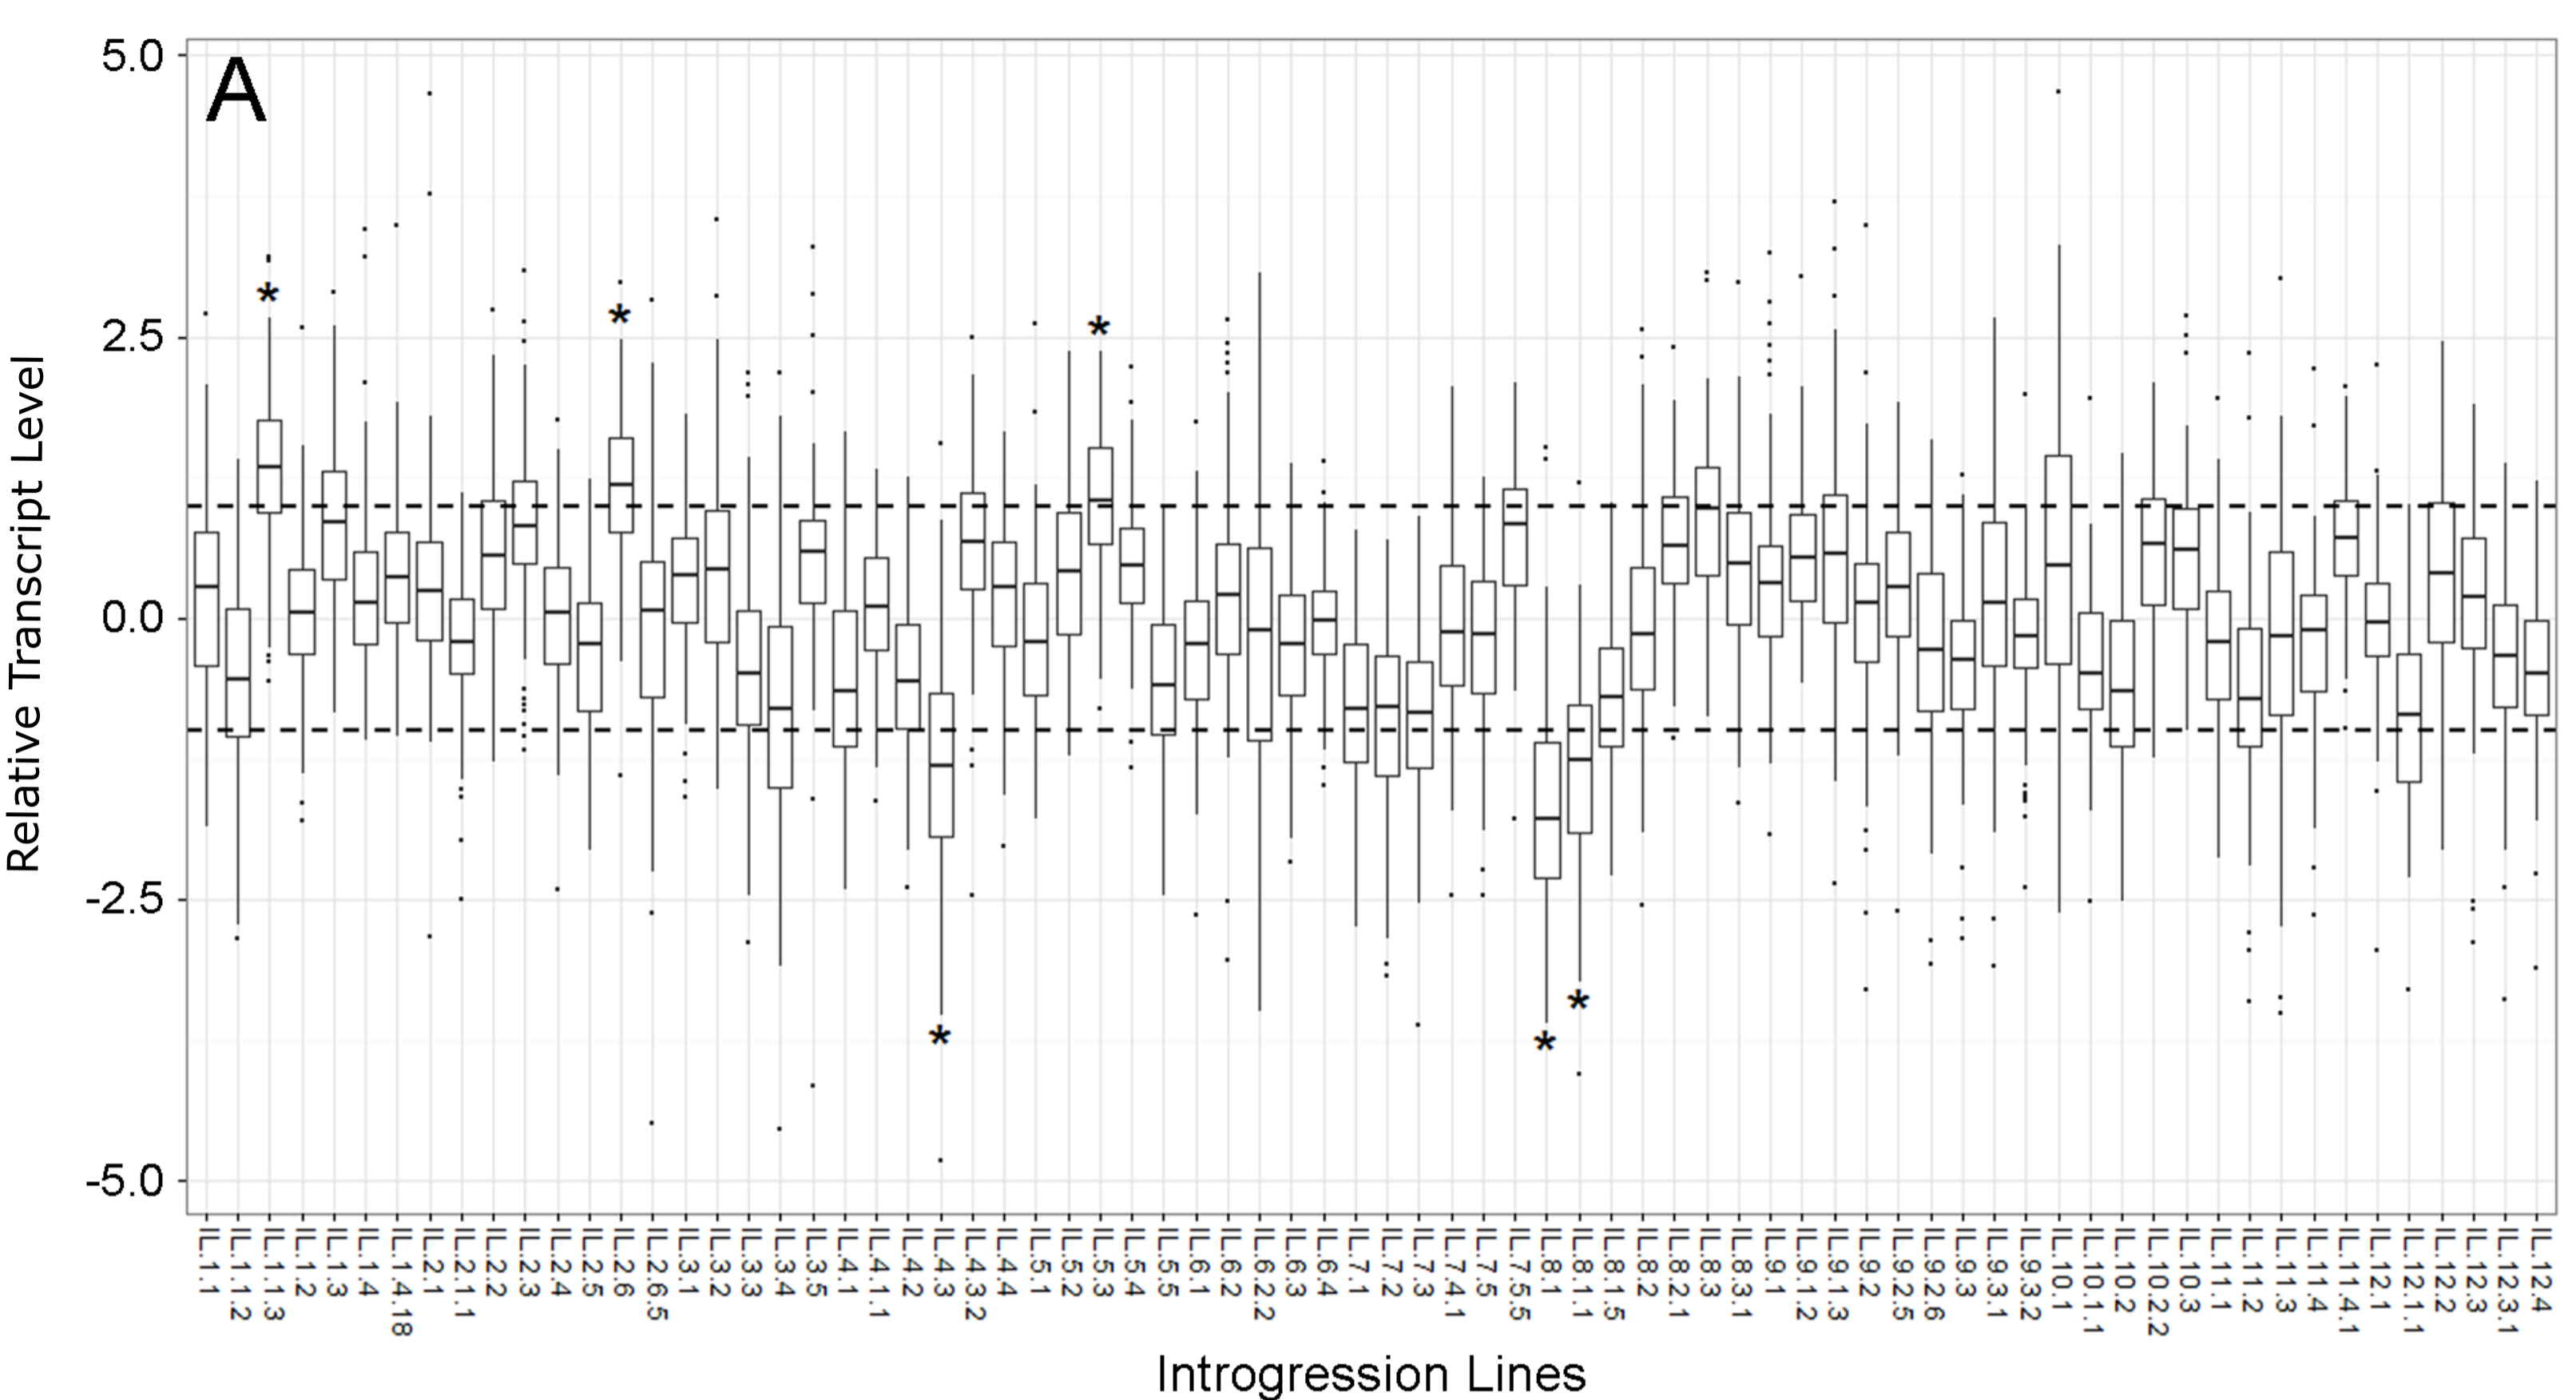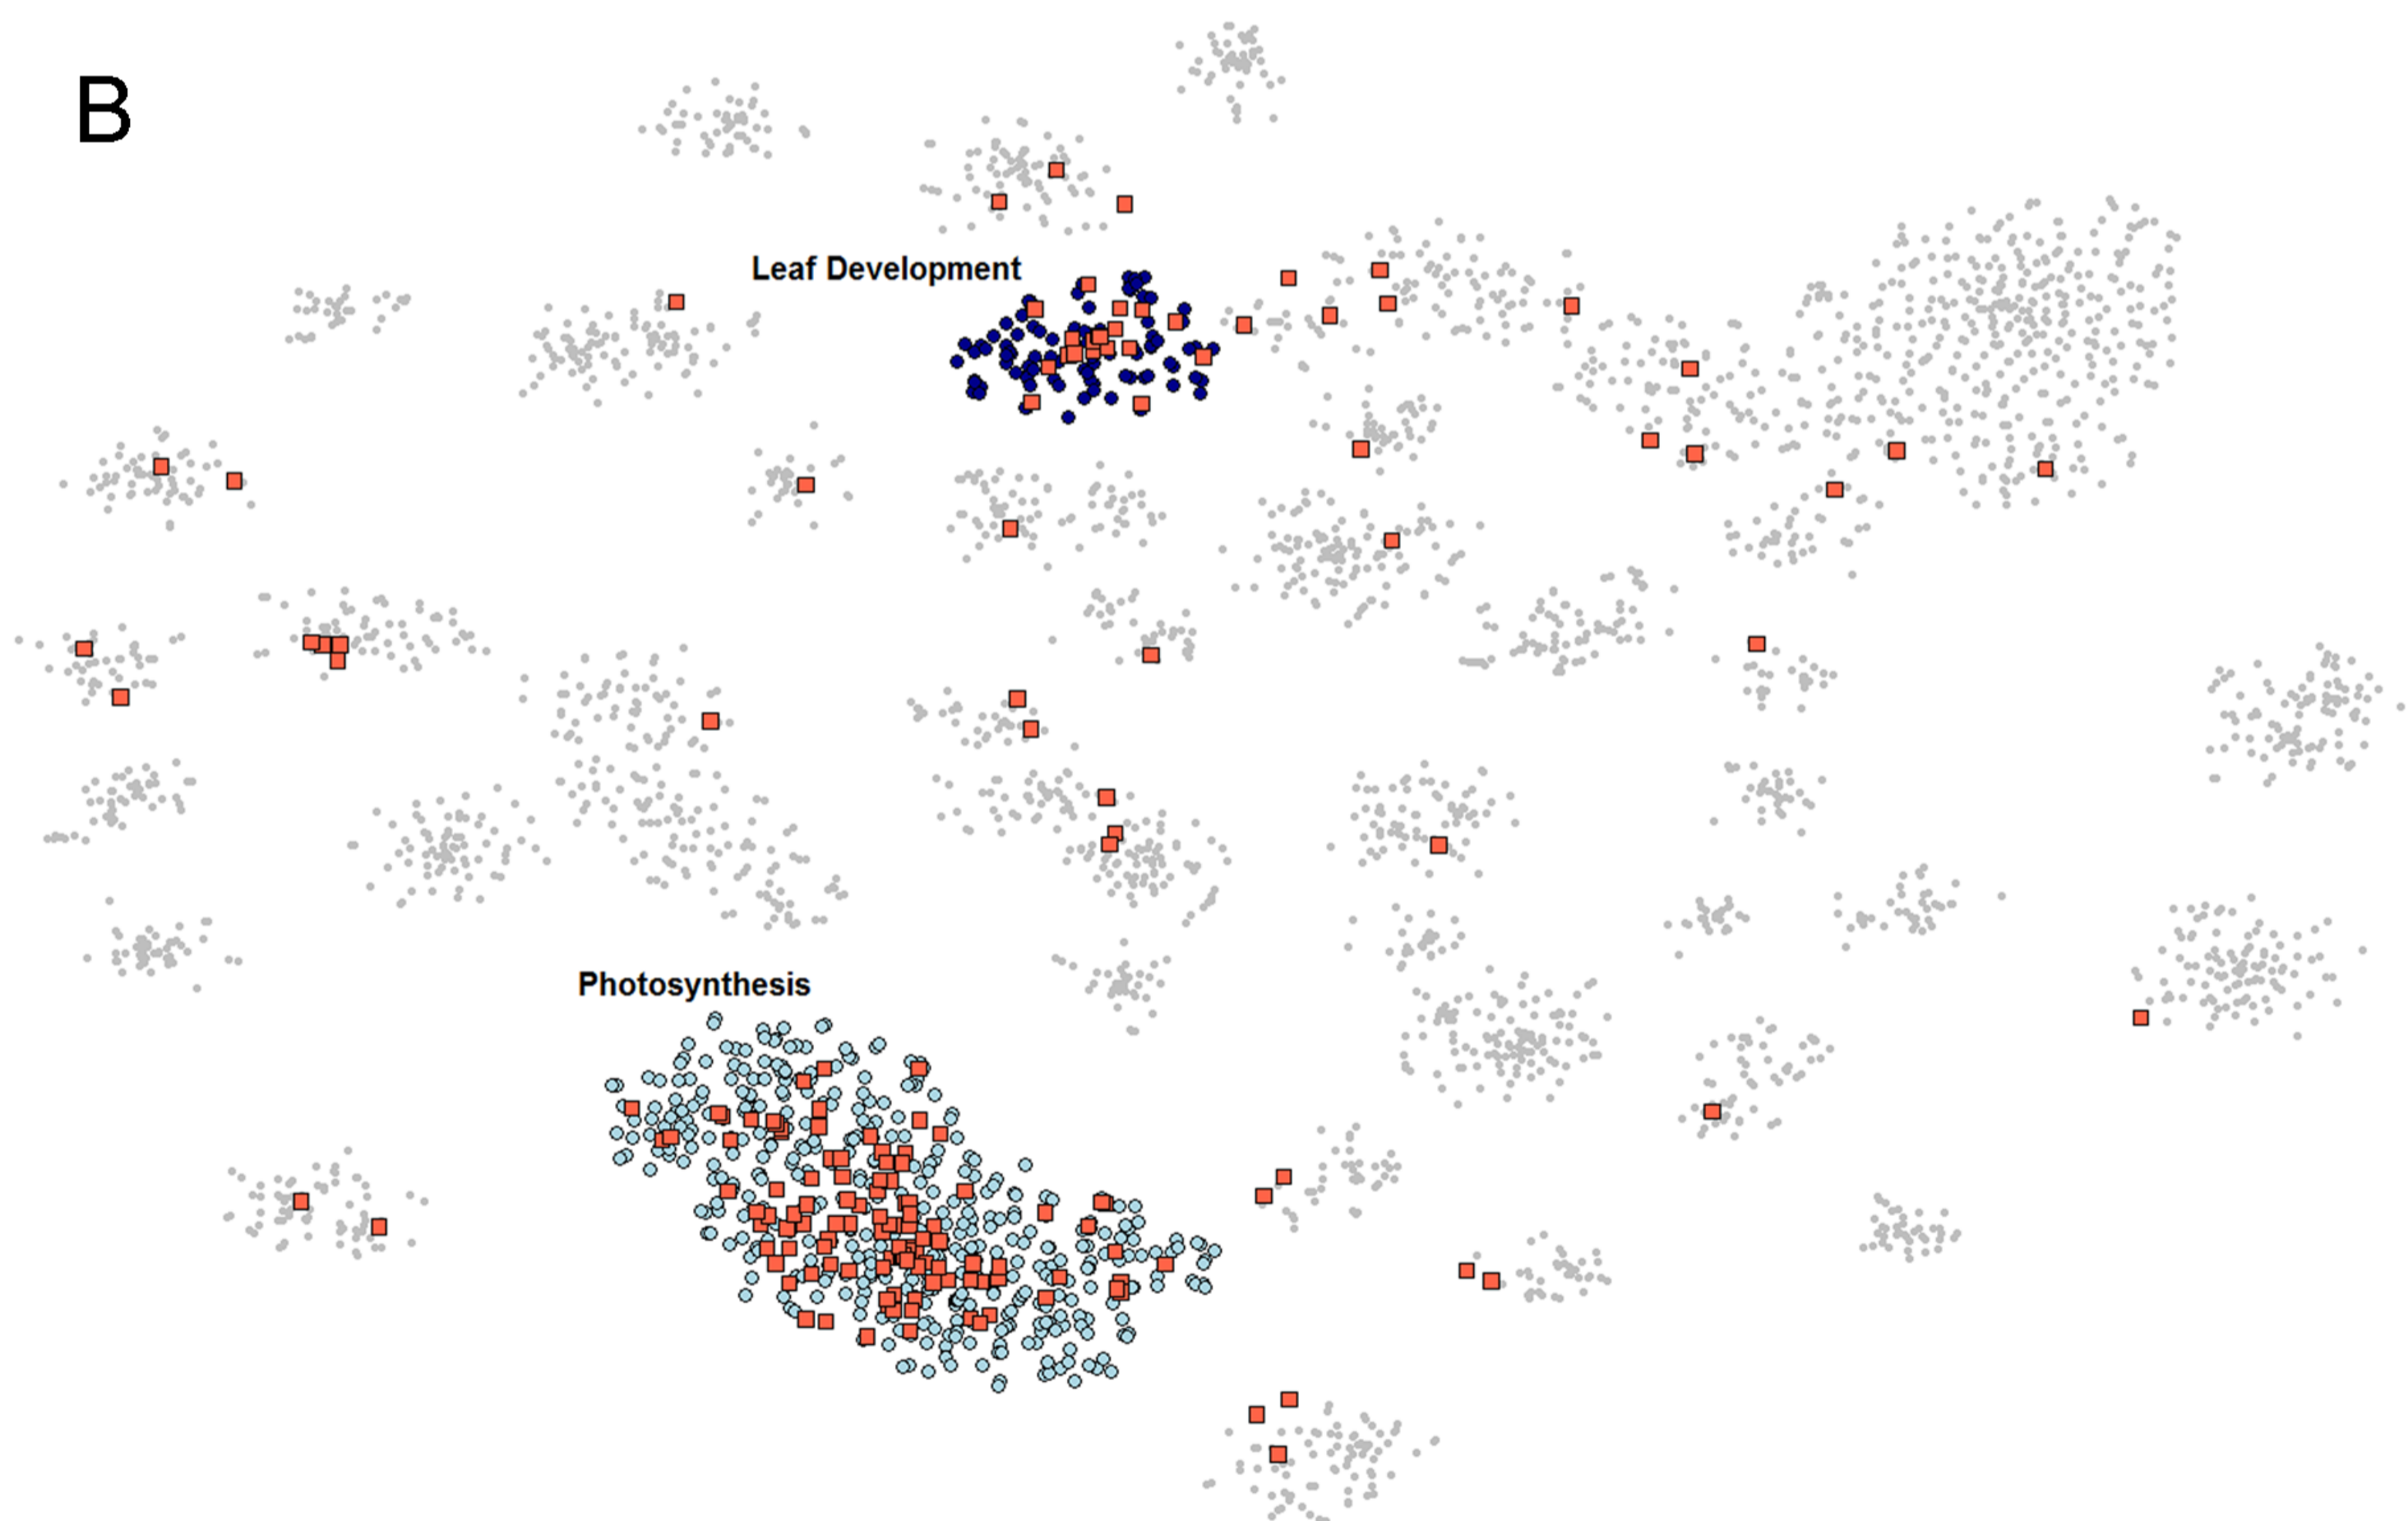

**Supplemental Figure S7. Normalized transcript levels of the leaf development module and genes associated with leaf development within the mapping.** (A) Boxplot of normalized transcript levels for the leaf development module. The 108 genes contained in the Leaf Development module and their relative median transcript level for each IL. Asterisks represent ILs with a median transcript level significantly different from the module mean. (B) Literature curated genes related to leaf development (Ichihashi et al., 2014) overlaid on the Leaf Development and Photosynthesis modules. False colored orange, dark blue, and light blue respectively.
