# Supplementary material
Source: PubMed Central journal article supplement (PMC5074602)
Supplement: supp_pp.16.00289_PP2016-00289DR2_Supplemental_Figure_10.pdf [file supp_pp.16.00289_PP2016-00289DR2_Supplemental_Figure_10.pdf]

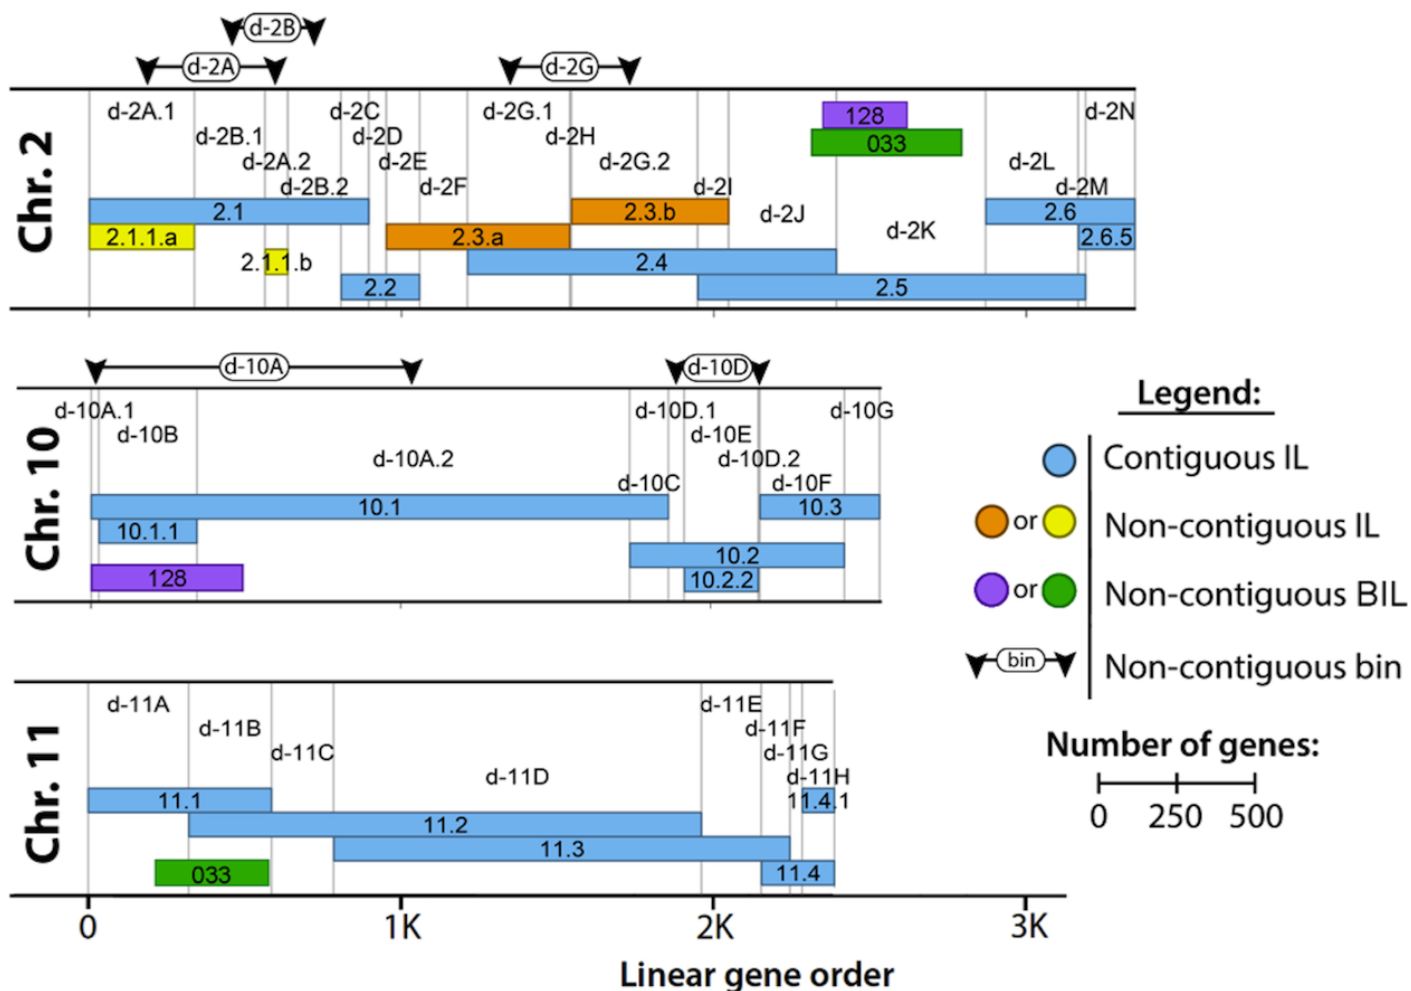

**Supplemental Figure S10. Distributions of introgressions from *S. pennellii* into *S. lycopersicum* cv. M82.**

Map of chromosomes 2, 10, and 11 showing the locations of the introgressions for BIL-033 and BIL-128, as well as the overlapping IL regions, which define the bind (Modified from Chitwood et al., 2013).
