# Supplementary material
Source: PubMed Central journal article supplement (PMC5074602)
Supplement: supp_pp.16.00289_PP2016-00289DR2_Supplemental_Figure_11.pdf [file supp_pp.16.00289_PP2016-00289DR2_Supplemental_Figure_11.pdf]

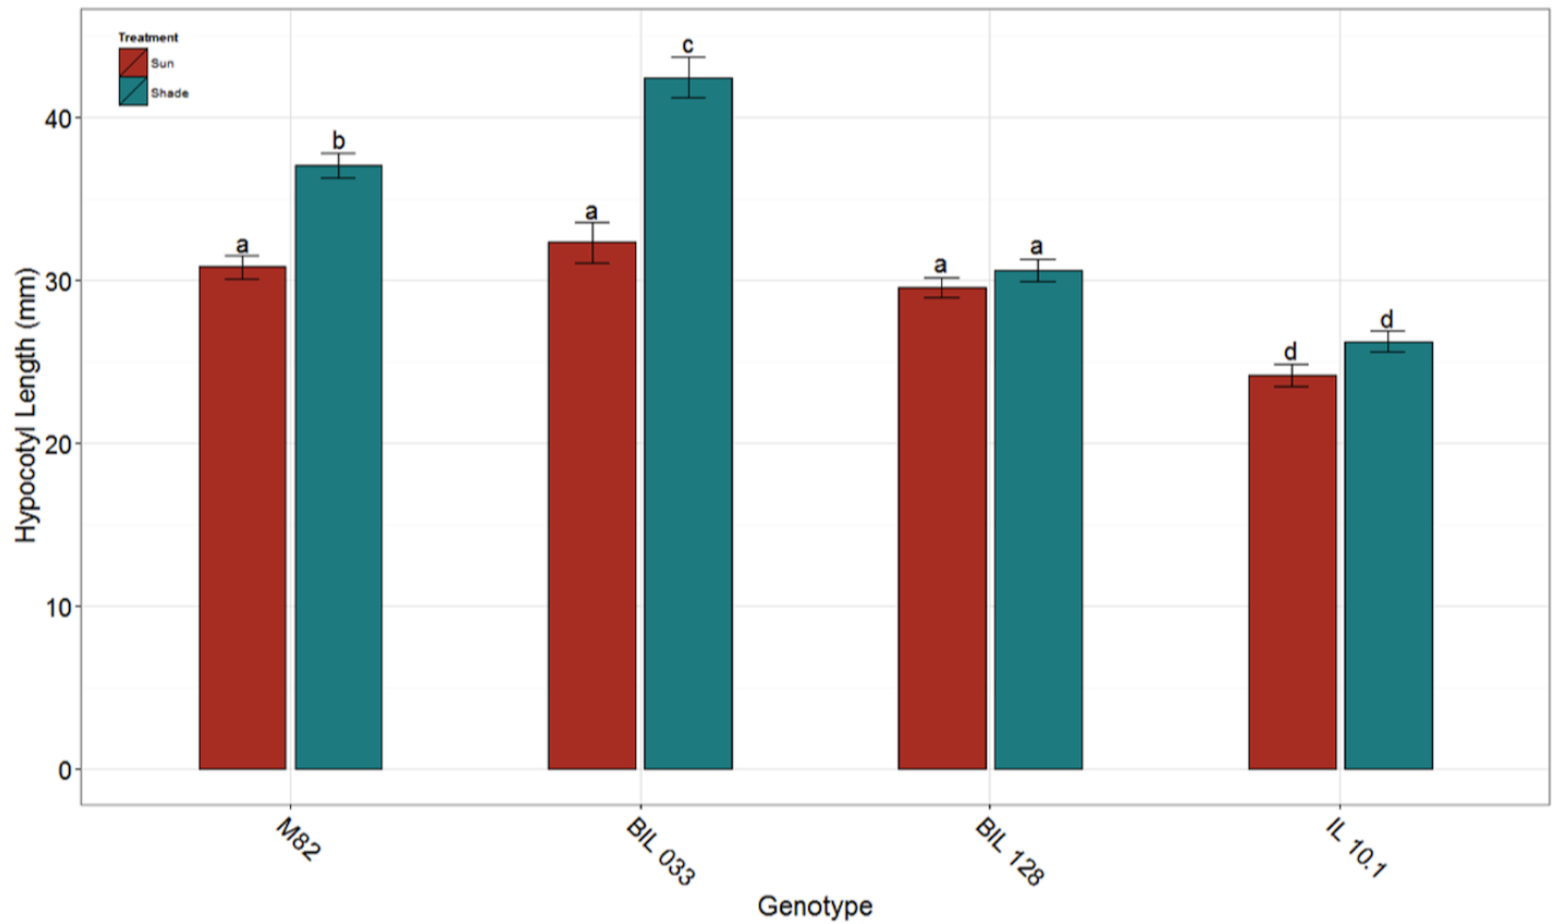

**Supplemental Figure S11. Tomato hypocotyl length under sun and shade treatments.**

M82 shows a typical shade response with a significantly longer hypocotyl in the shade ( $\Delta$  of 7 mm). IL 10.1 and BIL 128, which share an overlapping introgression (**Supplemental Fig. BIL**), do not significantly respond to the shade treatments. The presence of a response in BIL 033 in combination with the shared introgression with BIL 128 on chromosome 2, indicates that the gene region responsible for the lack of shade response in BIL 128 is located in the introgression on chromosome 10. Bars represent means  $\pm$  SE with a minimal of  $N = 22$  for each (ANOVA,  $F_{7,182} = 44.6$ ,  $p < 0.001$ ). Letters indicate differences at the  $p < 0.05$  significance level for Tukey pairwise tests.
