# Supplementary material
Source: PubMed Central journal article supplement (PMC5074602)
Supplement: supp_pp.16.00289_PP2016-00289DR2_Supplemental_Table_II.pdf [file supp_pp.16.00289_PP2016-00289DR2_Supplemental_Table_II.pdf]

**Supplemental Table II. Correlation coefficients (Spearman's rho) for significant eQTLs.** The significant eQTL are classified into *trans*-, *cis*-, and *chromo0*-, then designated as up (positive slope) or down (negative slope) based on the correlation coefficients.

|                       |      | Average | Range           |
|-----------------------|------|---------|-----------------|
| <i>trans</i> -eQTLs   | up   | 0.277   | 0.214 – 0.999   |
|                       | down | -0.233  | -0.356 – -0.214 |
| <i>cis</i> -eQTLs     | up   | 0.301   | 0.214 – 0.999   |
|                       | down | -0.267  | -0.392 – -0.214 |
| <i>chromo0</i> -eQTLs | up   | 0.356   | 0.215 – 0.999   |
|                       | down | -0.262  | -0.342 – -0.215 |
