# Supplementary material
Source: PubMed Central journal article supplement (PMC5074602)
Supplement: supp_pp.16.00289_PP2016-00289DR2_Supplemental_Table_III.pdf [file supp_pp.16.00289_PP2016-00289DR2_Supplemental_Table_III.pdf]

**Supplemental Table III. GO enrichment and *cis* or *trans* regulation of the 42 identified modules.** All 42 distinct modules are listed with the total number of genes present in each module. The GO enrichment (if one is present) is given for each module, along with whether that module is predominantly *cis* or *trans* regulated. Only nine of the forty two module show *trans* correlation, which includes the leaf development module.

| Cluster: | Total eQTLs: | GO Enrichment:                | Cis/Trans Regulation: |
|----------|--------------|-------------------------------|-----------------------|
| 1        | 66           | Translation                   | Trans                 |
| 2        | 111          | -                             | Cis                   |
| 3        | 114          | (cGMP/Ubq/Sumo)               | Trans                 |
| 4        | 492          | Defense/Metabolism/Signalling | Trans                 |
| 5        | 89           | Catalytic Activity            | Cis                   |
| 6        | 101          | -                             | Cis                   |
| 7        | 76           | Xanthine                      | Cis                   |
| 8        | 40           | -                             | Cis                   |
| 9        | 73           | -                             | Cis                   |
| 10       | 45           | Biotic Stimulus               | Trans                 |
| 11       | 516          | Photosynthesis                | Trans                 |
| 12       | 35           | Flower Development            | Cis/Trans             |
| 13       | 84           | Cell Wall Biosynthesis        | Trans                 |
| 14       | 29           | -                             | Cis                   |
| 15       | 112          | Metabolic                     | Cis                   |
| 16       | 108          | Leaf Development              | Trans                 |
| 17       | 40           | -                             | Cis                   |
| 18       | 167          | -                             | Cis                   |
| 19       | 72           | -                             | Cis                   |
| 20       | 33           | Steroid Syn./Nitrate Trans.   | Trans                 |
| 21       | 41           | (Sucrose Syn./Callose Dep.)   | Trans                 |
| 22       | 96           | -                             | Cis                   |
| 23       | 77           | Cell                          | Cis                   |
| 24       | 73           | -                             | Cis                   |
| 25       | 104          | Cysteine-Type Peptidase       | Cis                   |
| 26       | 48           | -                             | Cis                   |
| 27       | 44           | -                             | Cis                   |
| 28       | 51           | -                             | Cis                   |
| 29       | 27           | -                             | Cis                   |
| 30       | 39           | -                             | Cis                   |
| 31       | 72           | Lipid Transport               | Cis                   |
| 32       | 34           | -                             | Cis                   |
| 33       | 47           | -                             | Cis                   |
| 34       | 80           | -                             | Cis                   |
| 35       | 38           | CDK/tRNA Aminoacylation       | Cis                   |
| 36       | 44           | -                             | Cis                   |

|    |    |                             |     |
|----|----|-----------------------------|-----|
| 37 | 63 | -                           | Cis |
| 38 | 59 | Glutathione Transferase     | Cis |
| 39 | 35 | -                           | Cis |
| 40 | 37 | -                           | Cis |
| 41 | 53 | Negative Peptidase Activity | Cis |
| 42 | 27 | -                           | Cis |
