# Supplementary material
Source: PubMed Central journal article supplement (PMC5074602)
Supplement: supp_pp.16.00289_PP2016-00289DR2_Supplemental_Table_IV.pdf [file supp_pp.16.00289_PP2016-00289DR2_Supplemental_Table_IV.pdf]

| <b>Supplemental Table IV. Leaf developmental phenotypes of selected ILs and genetic effects of eQTL (bin) on transcript levels of candidate genes.</b> |                                                                                                           |                             |                                                                       |                             |                                |                                     |                             |
|--------------------------------------------------------------------------------------------------------------------------------------------------------|-----------------------------------------------------------------------------------------------------------|-----------------------------|-----------------------------------------------------------------------|-----------------------------|--------------------------------|-------------------------------------|-----------------------------|
| <b>ILs with significant leaf phenotype and associated eQTL(bin)</b>                                                                                    |                                                                                                           |                             | <b>Leaf developmental genes regulated by the regulatory eQTL(bin)</b> |                             |                                |                                     |                             |
| <b>ILs</b>                                                                                                                                             | <b>Leaf developmental phenotype</b>                                                                       | <b>Regulatory eQTL(bin)</b> | <b>itag</b>                                                           | <b>chromosomal location</b> | <b>Arabidopsis_ orthologue</b> | <b>Gene_name</b>                    | <b>Nature of regulation</b> |
| <b>IL2.1</b>                                                                                                                                           | transgressively narrower leaflet; reduced leaf complexity                                                 | 2C                          | Solyc02g064960                                                        | ch02:30651561-30655131      | AT4G36920                      | APETALA 2                           | cis_down                    |
|                                                                                                                                                        |                                                                                                           | 2C                          | Solyc12g010370                                                        | ch12:3424498-3425863        | AT4G28190                      | ULTRAPETALA 1                       | trans_up                    |
|                                                                                                                                                        |                                                                                                           | 2C                          | Solyc12g010760                                                        | ch12:3676998-3678363        | AT4G28190                      | ULTRAPETALA 1                       | trans_up                    |
| <b>IL4.3</b>                                                                                                                                           | wider leaflet; decreased length-to-width ratio; decreased serration and lobing; decreased leaf complexity | 4I                          | Solyc04g079830                                                        | ch04:61729325-61740234      | AT4G36870                      | SAWTOOTH 1                          | cis_up                      |
|                                                                                                                                                        |                                                                                                           | 4I                          | Solyc04g080780                                                        | ch04:62460512-62462135      | AT1G75430                      | BEL1-LIKE HOMEODOMAIN 11            | cis_up                      |
|                                                                                                                                                        |                                                                                                           | 4H                          | Solyc05g012840                                                        | ch05:5987496-5988167        | AT3G15030                      | TCP5                                | trans_up                    |
|                                                                                                                                                        |                                                                                                           | 4I                          | Solyc05g026480                                                        | ch05:41470829-41477244      | AT4G32551                      | LEUNIG                              | trans_up                    |
| <b>IL5.4</b>                                                                                                                                           | wider leaflet; transgressively more serrated and has increased leaf complexity                            | 5F                          | Solyc05g054180                                                        | ch05:63284096-63288543      | AT5G48160                      | OBERON 2                            | cis_up                      |
|                                                                                                                                                        |                                                                                                           | 5D                          | Solyc12g010370                                                        | ch12:3424498-3425863        | AT4G28190                      | ULTRAPETALA 1                       | trans_up                    |
|                                                                                                                                                        |                                                                                                           | 5D                          | Solyc12g010760                                                        | ch12:3676998-3678363        | AT4G28190                      | ULTRAPETALA 1                       | trans_up                    |
| <b>IL8.1/IL8.1.1/<br/>IL8.1.5</b>                                                                                                                      | Strong decrease in leaf complexity; decreased serration                                                   | 8B                          | Solyc06g065630                                                        | ch06:37403377-37405689      | AT5G11320                      | YUCCA 4                             | trans_down                  |
|                                                                                                                                                        |                                                                                                           | 8B                          | Solyc08g048390                                                        | ch08:39810608-39811771      | AT4G18390                      | TCP2                                | cis_up                      |
|                                                                                                                                                        |                                                                                                           | 8A                          | Solyc04g077490                                                        | ch04:60022685-60026057      | AT4G37750                      | AINTEGUMENTA                        | trans_down                  |
|                                                                                                                                                        |                                                                                                           | 8A                          | Solyc06g065630                                                        | ch06:37403377-37405689      | AT5G11320                      | YUCCA 4                             | trans_down                  |
|                                                                                                                                                        |                                                                                                           | 8A                          | Solyc08g006910                                                        | ch08:1487865-1491860        | AT4G32551                      | LEUNIG                              | cis_down                    |
|                                                                                                                                                        |                                                                                                           | 8A                          | Solyc12g014500                                                        | ch12:5468306-5475778        | AT5G55250                      | IAA CARBOXYLMETHYLTRANSFERASE 1     | trans_down                  |
| <b>IL9.1.2</b>                                                                                                                                         | transgressively narrower leaflet; reduced leaf complexity; increased serration and lobing                 | 9A                          | Solyc06g074730                                                        | ch06:42661355-42667953      | AT2G27880                      | ARGONAUTE 5                         | trans_up                    |
|                                                                                                                                                        |                                                                                                           | 9B                          | Solyc07g062470                                                        | ch07:62414891-62417919      | AT2G42610                      | LIGHT-DEPENDENT SHORT HYPOCOTYLS 10 | trans_up                    |
|                                                                                                                                                        |                                                                                                           | 9B                          | Solyc09g007830                                                        | ch09:1356808-1361135        | AT2G37210                      | LONELY GUY 3                        | cis_down                    |
