# Supplementary material
Source: PubMed Central journal article supplement (PMC5074602)
Supplement: supp_pp.16.00289_PP2016-00289DR2_Supplemental_Table_V.pdf [file supp_pp.16.00289_PP2016-00289DR2_Supplemental_Table_V.pdf]

**Supplemental Table V. Significant correlations between transcript expression patterns and phenotypes.** Bootstrapping analyses correlated transcript expression patterns across the 74 ILs with three phenotypes in under both sun and shade treatments. Genes with significant correlations that also have eQTL are listed.

| <b>Phenotype</b> | <b>Treatment</b> | <b>Significant Positive Correlations</b> | <b>Significant Negative Correlations</b> | <b>Significant Positive Correlations with eQTL</b> | <b>Significant Negative Correlations with eQTL</b> |
|------------------|------------------|------------------------------------------|------------------------------------------|----------------------------------------------------|----------------------------------------------------|
| Leaf Number      | Sun              | 257                                      | 27                                       | 112                                                | 17                                                 |
|                  | Shade            | 22                                       | 0                                        | 15                                                 | 0                                                  |
| Leaf Complexity  | Sun              | 8                                        | 9                                        | 5                                                  | 6                                                  |
|                  | Shade            | 17                                       | 28                                       | 11                                                 | 14                                                 |
| Hypocotyl Length | Sun              | 0                                        | 1                                        | 0                                                  | 1                                                  |
|                  | Shade            | 11                                       | 1                                        | 5                                                  | 1                                                  |
